# Supplementary material for: Competing C–H and C–F bond activation reactions of a fluorinated olefin at Rh: a fluorido vinylidene complex as an intermediate in an unprecedented dehydrofluorination step
Source: Royal Society of Chemistry journal article supplement (doi:10.1039/d1sc06713c), 2022-01-01
Supplement: d1sc06713c1.pdf [file d1sc06713c1.pdf]

**Competing C–H and C–F bond activation reactions of a  
fluorinated olefin at Rh: A fluoro vinylidene complex as an  
intermediate in an unprecedented dehydrofluorination step**

Maria Talavera and Thomas Braun\*

*Department of Chemistry, Humboldt-Universität zu Berlin, Brook-Taylor-Str. 2, 12489  
Berlin, Germany. E-mail: thomas.braun@cms.hu-berlin.de.*

## General Procedures, Methods and Materials

All experiments were carried out under an atmosphere of argon by Schlenk techniques. Solvents were dried by the usual procedures<sup>1</sup> and, prior to use, distilled under argon. The rhodium complexes [Rh(H)(PEt<sub>3</sub>)<sub>3</sub>] (**1**),<sup>2</sup> [Rh(CH<sub>3</sub>)(PEt<sub>3</sub>)<sub>3</sub>] (**8**),<sup>3</sup> [Rh(C≡CCF<sub>3</sub>)(CO)(PEt<sub>3</sub>)<sub>3</sub>] (**6**)<sup>4</sup> and [Rh( $\mu$ -F)(cyclooctene)<sub>2</sub>]<sub>2</sub><sup>5</sup> were prepared as described in the literature. All reagents were obtained from commercial sources. Unless stated, NMR spectra were recorded at room temperature on a Bruker DPX 300 or a Bruker Avance 300 spectrometer using the solvent as the internal lock. <sup>1</sup>H and <sup>13</sup>C{<sup>1</sup>H} signals are referred to residual solvent signals, those of <sup>31</sup>P{<sup>1</sup>H} to 85% H<sub>3</sub>PO<sub>4</sub> and the <sup>19</sup>F NMR spectra to external CFCl<sub>3</sub>. <sup>1</sup>H, <sup>19</sup>F, <sup>31</sup>P{<sup>1</sup>H} and <sup>13</sup>C{<sup>1</sup>H} NMR signal assignments were supported or, when stated, determined by <sup>1</sup>H,<sup>1</sup>H COSY, <sup>19</sup>F,<sup>1</sup>H HETCOR, <sup>19</sup>F,<sup>19</sup>F gCOSY, <sup>31</sup>P,<sup>31</sup>P COSY, <sup>1</sup>H,<sup>13</sup>C HMQC, <sup>1</sup>H,<sup>13</sup>C HMBC, <sup>19</sup>F,<sup>13</sup>C HMBC, <sup>19</sup>F,<sup>13</sup>C HMQC and <sup>1</sup>H,<sup>31</sup>P HMBC NMR experiments. The determined coupling constant values were confirmed by *gNMR* software simulations.<sup>6</sup> Mass spectra of organometallic complexes were measured with a Micromass Q-Tof-2 instrument equipped with a Linden LIFDI source (Linden CMS GmbH). Infrared spectra were recorded with the Platinum ATR module of a Bruker FT-IR Alpha II spectrometer.

Caution! In some experiments traces of HF might be generated. Immediate access to proper treatment procedures in case of contact with HF-containing solutions must be ensured.

### Reaction of *Z*-1,3,3,3-tetrafluoropropene with [Rh(H)(PEt<sub>3</sub>)<sub>3</sub>] (**1**)

In a Young NMR tube [Rh(H)(PEt<sub>3</sub>)<sub>3</sub>] (**1**) (30 mg, 0.065 mmol) was dissolved in toluene-d<sub>8</sub> (0.4 mL). The reaction mixture was frozen to 77 K, the NMR tube was degassed *in vacuo*, and pressurized with *Z*-1,3,3,3-tetrafluoropropene to 0.2 bar. The reaction was monitored at variable temperatures by NMR spectroscopy. At 233K full conversion of complex **1** to complex *fac*-[Rh(H)(CF<sub>3</sub>CHCHF)(PEt<sub>3</sub>)<sub>3</sub>] (**7**) was observed. At 273 K a 90% conversion, based on the <sup>19</sup>F NMR spectrum, of **7** into [Rh{(E)-CH=CHCF<sub>3</sub>}(PEt<sub>3</sub>)<sub>3</sub>] (**2**) was observed as well as the release of HF and traces of complexes [Rh{(E)-CF=CHCF<sub>3</sub>}(PEt<sub>3</sub>)<sub>3</sub>] (**3**) and [Rh{(Z)-CH=CHCF<sub>3</sub>}(PEt<sub>3</sub>)<sub>3</sub>] (**4**). Finally, after 10 minutes at room temperature, a mixture of [Rh{(E)-CH=CHCF<sub>3</sub>}(PEt<sub>3</sub>)<sub>3</sub>] (**2**), [Rh{(E)-CF=CHCF<sub>3</sub>}(PEt<sub>3</sub>)<sub>3</sub>] (**3**), [Rh{(Z)-

$\text{CH}=\text{CHCF}_3\}\text{(PEt}_3\text{)}_3]$  (**4**) and  $[\text{Rh}\{\text{F}(\text{HF})_2\}\text{(PEt}_3\text{)}_3]$  (**5**) was detected in a 1:8:5 ratio. In addition, 3,3,3-trifluoropropene was observed.

When the reaction is directly warm up to room temperature, the same product mixture is observed. After 30 minutes, the ratio of complexes **2**, **3**, **4** and **5** is 3.8:2:1:4.4. After one day,  $[\text{Rh}(\text{C}\equiv\text{CCF}_3)\text{(PEt}_3\text{)}_3]$  (**6**) and complex **5** are the only products in a 1:1 ratio. Complexes **2**, and **6** have been identified by comparison with literature.<sup>4,7</sup> Complex **5** was identified by comparison with  $[\text{Rh}(\text{FHF})\text{(PEt}_3\text{)}_3]$ ,<sup>7</sup> however, P-F couplings are not observed which suggest the presence of more than one HF molecule leading to the proposed formula  $[\text{Rh}\{\text{F}(\text{HF})_2\}\text{(PEt}_3\text{)}_3]$  (**5**). Addition of excess of  $\text{NEt}_3/\text{Cs}_2\text{CO}_3$  to remove the excess of HF, led to the formation of  $[\text{Rh}(\text{F})\text{(PEt}_3\text{)}_3]$ .<sup>7</sup>

The amount of HF in complex **5** was determined by adding  $\text{ClSiEt}_3$  (0.059 mmol, 6.5 equiv) to a solution of complexes **6** and **5** (0.009 mmol of **5** based on the  $^{31}\text{P}\{^1\text{H}\}$  NMR ratio). After 10 min, full conversion of complex **5** into  $[\text{Rh}(\text{Cl})\text{(PEt}_3\text{)}_3]$  and dihydrido chlorido rhodium(III) species was observed with a 45% conversion of  $\text{ClSiEt}_3$  (determined directly from the  $^1\text{H}$  NMR spectrum and supported by external standard of  $\text{PhCF}_3$ ) into  $\text{FSiEt}_3$  and  $\text{F}_2\text{SiEt}_2$  (0.027 mmol in total). The 3 equivalents required would correspond to two HF moieties and the rhodium-bounded fluorido ligand.

Analytical data for  $[\text{Rh}\{\text{(Z)-CH}=\text{CHCF}_3\}\text{(PEt}_3\text{)}_3]$  (**4**):  $^1\text{H}$  NMR (300.1 MHz,  $\text{C}_6\text{D}_6$ ):  $\delta = 8.35$  (dt,  $^3J_{\text{H,H}} = 14.1$ ,  $^3J_{\text{H,Pcis}} = 4.3$  Hz,  $\text{CH}=\text{}$ ); 6.61 (m, ddq in  $^1\text{H}\{^{19}\text{F}\}$  NMR spectrum, dqd in  $^1\text{H}\{^{31}\text{P}\}$  NMR spectrum,  $^3J_{\text{H,H}} = 13.9$ ,  $^4J_{\text{H,Ptrans}} = 11.8$ ,  $^3J_{\text{H,F}} = 8.7$ ,  $^4J_{\text{H,Pcis}} \approx ^3J_{\text{H,Rh}} = 2.3$  Hz,  $=\text{CHCF}_3$ ) ppm; the resonances corresponding to the phosphine ligands are overlapped with the signals for the other products.  $^{19}\text{F}$  NMR (282.4 MHz,  $\text{C}_6\text{D}_6$ ):  $\delta = -59.7$  (m, tt in  $^{19}\text{F}\{^1\text{H}\}$  NMR spectrum,  $^5J_{\text{F,Pcis}} = 5.5$ ,  $^5J_{\text{F,Ptrans}} \approx ^4J_{\text{F,Rh}} = 1.7$  Hz, 3F,  $\text{CF}_3$ ) ppm.  $^{31}\text{P}\{^1\text{H}\}$  NMR (121.5 MHz,  $\text{C}_6\text{D}_6$ ):  $\delta = 12.5$  (ddq,  $^1J_{\text{P,Rh}} = 154.6$ ,  $^2J_{\text{P,P}} = 38.9$ ,  $^5J_{\text{P,F}} = 4.9$  Hz, 2P,  $\text{P}_{\text{cis}}$ ) ppm; the resonance of  $\text{P}_{\text{trans}}$  is overlapped with the signals for the other compounds.

Analytical data for  $[\text{Rh}\{\text{F}(\text{HF})_2\}\text{(PEt}_3\text{)}_3]$  (**5**):  $^1\text{H}$  NMR (300.1 MHz,  $\text{C}_6\text{D}_6$ ):  $\delta = 1.65\text{-}1.50$  (m, q in  $^1\text{H}\{^{31}\text{P}\}$ ,  $^3J_{\text{H,H}} = 7.7$  Hz, 12H,  $\text{P}_{\text{cis}}\text{CH}_2\text{CH}_3$ ); 1.25-1.15 (m, q in  $^1\text{H}\{^{31}\text{P}\}$ ,  $^3J_{\text{H,H}} = 7.2$  Hz 6H,  $\text{P}_{\text{trans}}\text{CH}_2\text{CH}_3$ ); 1.17-1.03 (m, t in  $^1\text{H}\{^{31}\text{P}\}$ ,  $^3J_{\text{H,H}} = 7.7$  Hz, 18H,  $\text{P}_{\text{cis}}\text{CH}_2\text{CH}_3$ ); 0.96 (dt,  $^3J_{\text{H,P}} = 14.9$ ,  $^3J_{\text{H,H}} = 7.2$  Hz, 9H,  $\text{P}_{\text{trans}}\text{CH}_2\text{CH}_3$ );.  $^{19}\text{F}$  NMR (282.4 MHz,  $\text{C}_6\text{D}_6$ ):  $\delta = -178$  (br m, HF);  $-277.0$  (m, 1F, Rh-F) ppm.  $^{31}\text{P}\{^1\text{H}\}$  NMR (121.5 MHz,  $\text{C}_6\text{D}_6$ ):  $\delta = 45.83$  (dt br,

$^1J_{P,Rh} = 187.7$ ,  $^2J_{P,P} = 42.5$  Hz, 1P,  $P_{trans}$ ); 23.26 (dd,  $^1J_{P,Rh} = 139.6$ ,  $^2J_{P,P} = 42.5$  Hz, 2P,  $P_{cis}$ ) ppm

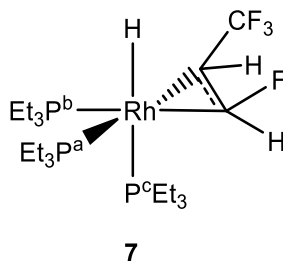

Analytical data for *fac*-[Rh(H)(CF<sub>3</sub>CHCHF)(PEt<sub>3</sub>)<sub>3</sub>] (**7**): **<sup>1</sup>H NMR** (300.1 MHz, 233 K, toluene-d<sup>8</sup>): δ = 5.85 (d br, ddd in <sup>1</sup>H{<sup>31</sup>P} NMR spectrum, <sup>2</sup>J<sub>H,F</sub> = 67.4, <sup>3</sup>J<sub>H,H</sub> = 5.3, <sup>2</sup>J<sub>H,Rh</sub> = 2.1 Hz, CHF); 2.14 (m, overlapped with the signal for toluene-d<sup>8</sup>, observed by a <sup>1</sup>H-<sup>1</sup>H COSY spectrum, CHCF<sub>3</sub>); 1.55-1.78 (m, 6H, PCH<sub>2</sub>CH<sub>3</sub>); 1.32-1.54 (m, 6H, PCH<sub>2</sub>CH<sub>3</sub>); 0.93-1.18 (m, 24H, PCH<sub>2</sub>CH<sub>3</sub> + PCH<sub>2</sub>CH<sub>3</sub>); 0.74 (dt, <sup>3</sup>J<sub>H,P</sub> = 12.8, <sup>3</sup>J<sub>H,H</sub> = 6.9 Hz, 9H, PCH<sub>2</sub>CH<sub>3</sub>); -13.22 (dq, <sup>2</sup>J<sub>H,Pc</sub> = 160.0, <sup>2</sup>J<sub>H,Pa</sub> ≈ <sup>2</sup>J<sub>H,Pb</sub> ≈ <sup>3</sup>J<sub>H,F</sub> = 19.8, <sup>1</sup>J<sub>H,Rh</sub> = 12.2 Hz, 1H, RhH) ppm. **<sup>19</sup>F NMR** (282.4 MHz, 253 K, toluene-d<sup>8</sup>): δ = -49.6 (q br, <sup>4</sup>J<sub>F,P</sub> ≈ <sup>4</sup>J<sub>F,F</sub> ≈ <sup>3</sup>J<sub>F,H</sub> = 13 Hz, 3F, CF<sub>3</sub>); -182.7 (dm, <sup>2</sup>J<sub>F,H</sub> = 68 Hz, 1F, CF) ppm. **<sup>31</sup>P{<sup>1</sup>H} NMR** (121.4 MHz, 233K, toluene-d<sup>8</sup>): δ = 19.29 (dddqd, <sup>1</sup>J<sub>P,Rh</sub> = 135.4, <sup>3</sup>J<sub>P,Pb</sub> = 29.5, <sup>2</sup>J<sub>P,Pc</sub> = 26.0, <sup>4</sup>J<sub>P,F</sub> = 16.2, <sup>3</sup>J<sub>P,F</sub> = 13.0 Hz, 1P, P<sup>a</sup>); 10.85 (dq, <sup>1</sup>J<sub>P,Rh</sub> = 111.9, <sup>3</sup>J<sub>P,F</sub> ≈ <sup>2</sup>J<sub>P,Pc</sub> ≈ <sup>2</sup>J<sub>P,Pa</sub> = 29.7 Hz, P<sup>b</sup>); 0.87 (br dq, <sup>1</sup>J<sub>P,Rh</sub> = 84.0, <sup>2</sup>J<sub>P,Pa</sub> ≈ <sup>2</sup>J<sub>P,Pb</sub> ≈ <sup>3</sup>J<sub>P,F</sub> = 27.2 Hz, P<sup>c</sup>) ppm.

### Synthesis of [Rh{(E)-CH=CHCF<sub>3</sub>}(PEt<sub>3</sub>)<sub>3</sub>] (**2**)

In a Young NMR tube [Rh(CH<sub>3</sub>)(PEt<sub>3</sub>)<sub>3</sub>] (**8**) (50 mg, 0.106 mmol) was dissolved in C<sub>6</sub>D<sub>6</sub> (0.4 mL). The reaction mixture was frozen to 77 K, the NMR tube was degassed *in vacuo*, and pressurized with 3,3,3-trifluoropropene to 0.2 bar. After warming up to room temperature the reaction mixture was kept for 30 min before the volatiles were removed under vacuum. An orange/reddish oil, identified as [Rh{(E)-CH=CHCF<sub>3</sub>}(PEt<sub>3</sub>)<sub>3</sub>] (**2**) by comparison with the literature,<sup>8</sup> was obtained. Yield: 57 mg (98%).

### Reaction of [Rh{(E)-CH=CHCF<sub>3</sub>}(PEt<sub>3</sub>)<sub>3</sub>] (**2**) with Z-1,3,3,3-tetrafluoropropene

In a Young NMR tube [Rh{(E)-CH=CHCF<sub>3</sub>}(PEt<sub>3</sub>)<sub>3</sub>] (**2**) (31 mg, 0.056 mmol) was dissolved in C<sub>6</sub>D<sub>6</sub> (0.4 mL). The reaction mixture was frozen to 77 K, the NMR tube was degassed *in vacuo*, and pressurized with Z-1,3,3,3-tetrafluoropropene to 0.2 bar. After warming up to

room temperature the NMR spectroscopic data of the reaction mixture revealed after 50 min the full conversion of **2** into  $[\text{Rh}\{(E)\text{-CF=CHCF}_3\}(\text{PEt}_3)_3]$  (**3**) as well as the release of 3,3,3-trifluoropropene. For the analytical data of complex **3** see below.

#### Reaction of $[\text{Rh}\{(E)\text{-CH=CHCF}_3\}(\text{PEt}_3)_3]$ (**2**) with $\text{Et}_3\text{N}\cdot 3\text{HF}$

In an NMR tube equipped with a PFA inliner  $[\text{Rh}\{(E)\text{-CH=CHCF}_3\}(\text{PEt}_3)_3]$  (**2**) (24 mg, 0.043 mmol) was dissolved in  $\text{C}_6\text{D}_6$  (0.3 mL). Then, excess of  $\text{NEt}_3\cdot 3\text{HF}$  (7  $\mu\text{L}$ , 0.04 mmol) was added to the solution. After 5 minutes at room temperature, the NMR spectroscopic data of the reaction mixture revealed the full conversion of **2** into  $[\text{Rh}\{\text{F}(\text{HF})_2\}(\text{PEt}_3)_3]$  (**5**) (see above) as well as the release of 3,3,3-trifluoropropene.

#### Reaction of *Z*-1,3,3,3-tetrafluoropropene with $[\text{Rh}(\text{CH}_3)(\text{PEt}_3)_3]$ (**8**)

In a Young NMR tube  $[\text{Rh}(\text{CH}_3)(\text{PEt}_3)_3]$  (**8**) (42 mg, 0.089 mmol) was dissolved in  $\text{C}_6\text{D}_6$  (0.4 mL). The reaction mixture was frozen to 77 K, the NMR tube was degassed *in vacuo*, and pressurized with *Z*-1,3,3,3-tetrafluoropropene to 0.2 bar. After warming up to room temperature the NMR spectroscopic data of the reaction mixture revealed after 50 min the full conversion of **8** into  $[\text{Rh}\{(E)\text{-CF=CHCF}_3\}(\text{PEt}_3)_3]$  (**3**) as well as the release of methane. Note that complex **3** is stable when the solvents were removed in vacuum to yield a reddish oil. When the formation of **3** was followed by low temperature NMR spectroscopy, complex *fac*- $[\text{Rh}(\text{CH}_3)(\text{CF}_3\text{CHCHF})(\text{PEt}_3)_3]$  (**9**) was observed up to 253 K together with an unknown complex which might be an isomer of **9** in a 16:1 ratio, respectively. Complex **3** is stable up to 4h both in solution or as an oil and after 1d,  $[\text{Rh}(\text{C}\equiv\text{CCF}_3)(\text{PEt}_3)_3]$  (**6**) and  $[\text{Rh}\{\text{F}(\text{HF})_2\}(\text{PEt}_3)_3]$  (**5**) in a 5.7:1 ratio are obtained. If  $\text{NEt}_3/\text{Cs}_2\text{CO}_3$  (2 equiv) are added, the dehydrofluorination requires 2 days but only complex **6** is obtained.

Analytical data for **3**:  $^1\text{H NMR}$  (300.1 MHz,  $\text{C}_6\text{D}_6$ ):  $\delta = 5.37$  (dq,  $^3J_{\text{H,F}} = 51.8$ ,  $^3J_{\text{H,H}} = 8.7$  Hz, 1H, =CH); 1.65 (q br,  $^3J_{\text{H,H}} = 7.6$  Hz, 12H,  $P_{\text{cis}}\text{CH}_2\text{CH}_3$ ); 1.31 (quint d,  $^3J_{\text{H,H}} = 7.6$ ,  $^2J_{\text{H,P}} = 5.0$  Hz, 6H,  $P_{\text{trans}}\text{CH}_2\text{CH}_3$ ); 1.02 (m, t in  $^1\text{H}\{^{31}\text{P}\}$  NMR spectrum,  $^3J_{\text{H,H}} = 7.6$  Hz, 18H,  $P_{\text{cis}}\text{CH}_2\text{CH}_3$ ); 0.92 (dt,  $^3J_{\text{H,P}} = 14.1$ ,  $^3J_{\text{H,H}} = 7.8$ , 9H,  $P_{\text{trans}}\text{CH}_2\text{CH}_3$ ) ppm.  $^{19}\text{F NMR}$  (282.4 MHz,  $\text{C}_6\text{D}_6$ ):  $\delta = -26.6$  (ddqd,  $^3J_{\text{F,H}} = 52$ ,  $^3J_{\text{F,P}} = 41$ ,  $^4J_{\text{F,F}} = 13$ ,  $^2J_{\text{F,Rh}} = 9$  Hz, 1F, F); -54.1 (ddt,  $^4J_{\text{F,F}} = 13$ ,  $^3J_{\text{F,H}} = 9$ ,  $^5J_{\text{F,P}_{\text{cis}}} = 5$  Hz, 3F,  $\text{CF}_3$ ) ppm.  $^{31}\text{P}\{^1\text{H}\}$  NMR (121.4 MHz,  $\text{C}_6\text{D}_6$ ):  $\delta = 18.29$  (dtd,  $^1J_{\text{P,Rh}} = 115.8$ ,  $^3J_{\text{P,F}} = 39.4$ ,  $^2J_{\text{P,P}} = 36.2$  Hz,  $P_{\text{trans}}$ ); 14.9 (ddq,  $^1J_{\text{P,Rh}} = 148.9$ ,  $^2J_{\text{P,P}}$

= 37.7,  $^5J_{P,F} = 4.5$  Hz,  $P_{cis}$ ) ppm.  $^{13}\text{C}\{^1\text{H}\}$  NMR (75.5 MHz,  $\text{C}_6\text{D}_6$ ):  $\delta = 221$  (dm in the  $^{13}\text{C}$  domain,  $^1J_{C,F} = 363$  Hz, observed in a  $^1\text{H},^{13}\text{C}$  HMBC NMR spectrum, =CF); 124 (qm in the  $^{13}\text{C}$  domain,  $^1J_{C,F} = 264$  Hz, observed in a  $^1\text{H},^{13}\text{C}$  HMBC NMR spectrum,  $\text{CF}_3$ ); 106 (m, observed in a  $^1\text{H},^{13}\text{C}$  HMQC NMR spectrum, =CH); 19 (m, observed in a  $^1\text{H},^{13}\text{C}$  HMQC NMR spectrum,  $\text{P}^{\text{trans}}\text{CH}_2\text{CH}_3$ ); 18 (m, observed in a  $^1\text{H},^{13}\text{C}$  HMQC NMR spectrum,  $\text{P}^{\text{cis}}\text{CH}_2\text{CH}_3$ ); 9 (m, observed in a  $^1\text{H},^{13}\text{C}$  HMQC NMR spectrum,  $\text{PCH}_2\text{CH}_3$ ) ppm.

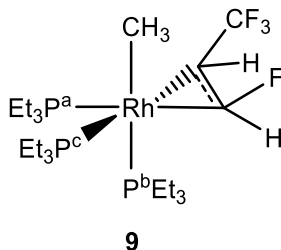

Analytical data for **9**:  $^1\text{H}$  NMR (300.1 MHz, 238 K, toluene- $d^8$ ):  $\delta = 5.28$  (dd br, ddd in  $^1\text{H}\{^{31}\text{P}\}$  NMR spectrum,  $^2J_{H,F} = 67.9$ ,  $^3J_{H,H} = 5.4$ ,  $^2J_{H,Rh} = 2.3$  Hz, CHF); 1.95 (m br, 1H,  $\text{CHCF}_3$ ); 1.49-1.76 (m, 18H,  $\text{PCH}_2\text{CH}_3$ ); 0.86-1.24 (m, 27H,  $\text{PCH}_2\text{CH}_3$ ); -0.74 (td,  $^2J_{H,P_a} \approx ^2J_{H,P_c} = 7.9$ ,  $^2J_{H,P_b} = 4.6$  Hz, 3H,  $\text{RhCH}_3$ ) ppm.  $^{19}\text{F}$  NMR (282.4 MHz, 238 K, toluene- $d^8$ ):  $\delta = -49.1$  (dt br,  $^4J_{F,P_c} = 19$ ,  $^3J_{F,H} \approx ^3J_{F,Rh} = 9$  Hz, 3F,  $\text{CF}_3$ ); -182.6 (m, t br in  $^{19}\text{F}\{^1\text{H}\}$  NMR spectrum,  $J \approx 35$  Hz, 1F, F) ppm.  $^{31}\text{P}\{^1\text{H}\}$  NMR (121.4 MHz, 238K, toluene- $d^8$ ):  $\delta = 8.269$  (dddqd,  $^1J_{P,Rh} = 130.1$ ,  $^3J_{P,P_a} = 30.62$ ,  $^2J_{P,P_b} = 24.65$ ,  $^4J_{P,F} = 20.10$ ,  $^3J_{P,F} = 3.40$  Hz, 1P,  $\text{P}^c$ ); 6.176 (ddddq,  $^1J_{P,Rh} = 91.97$ ,  $^3J_{P,F} = 28.88$ ,  $^2J_{P,P_a} = 26.28$ ,  $^2J_{P,P_c} = 24.65$ ,  $^4J_{P,F} = 0.97$  Hz, 1P,  $\text{P}^b$ ); -5.335 (ddddq,  $^1J_{P,Rh} = 102.98$ ,  $^3J_{P,F} = 42.27$ ,  $^2J_{P,P_c} = 30.62$ ,  $^2J_{P,P_b} = 26.28$ ,  $^4J_{P,F} = -1.11$  Hz, 1P,  $\text{P}^a$ ) ppm.  $^{31}\text{P}\{^1\text{H}\}$  NMR shifts and coupling constants were determined by *gNMR* software.<sup>6</sup>

### Reaction of $[\text{Rh}\{(\text{E})\text{-CF}=\text{CHCF}_3\}(\text{PEt}_3)_3]$ (**3**) with $\text{BF}_3$

In a PFA tube  $[\text{Rh}\{(\text{E})\text{-CF}=\text{CHCF}_3\}(\text{PEt}_3)_3]$  (**3**) (20 mg, 0.035 mmol) was dissolved in  $\text{CD}_2\text{Cl}_2$  (0.3 mL). The reaction mixture was frozen to 77 K, the PFA tube was degassed *in vacuo*, and a defined amount of  $\text{BF}_3$  (0.04 mmol) was condensed into the reaction vessel using a stainless-steel vacuum line. After warming up to 263 K the NMR spectroscopic data of the reaction mixture revealed the full conversion of **3** into  $[\text{Rh}(\text{PEt}_3)_4]\text{BF}_4$ , a  $[\text{Rh}(\text{PEt}_3)_2]\text{BF}_4$  derivative and  $[\text{Rh}(\text{C}\equiv\text{CCF}_3)(\text{PEt}_3)_3]$  (**6**) in a 1:2:2 ratio.

### Reaction of [Rh(*E*)-CF=CHCF<sub>3</sub>](PEt<sub>3</sub>)<sub>3</sub> (**3**) with LiBF<sub>4</sub>

In an NMR tube equipped with a PFA inliner [Rh(*E*)-CF=CHCF<sub>3</sub>](PEt<sub>3</sub>)<sub>3</sub> (**3**) (20 mg, 0.035 mmol) was dissolved in THF-d<sup>8</sup> (0.3 mL). Then, LiBF<sub>4</sub> (4 mg, 0.043 mmol) was added to the solution. After 30 minutes at room temperature, the NMR spectroscopic data of the reaction mixture revealed the full conversion of **6** into [Rh(PEt<sub>3</sub>)<sub>4</sub>]BF<sub>4</sub>, [Rh(THF-d<sup>8</sup>)(PEt<sub>3</sub>)<sub>2</sub>]BF<sub>4</sub> and [Rh(C≡CCF<sub>3</sub>)(PEt<sub>3</sub>)<sub>3</sub>] (**6**) in a 5:2.3:1 ratio.

### Reaction of [Rh(*E*)-CF=CHCF<sub>3</sub>](PEt<sub>3</sub>)<sub>3</sub> (**3**) with CO or <sup>13</sup>CO

Complex [Rh(*E*)-CF=CHCF<sub>3</sub>](PEt<sub>3</sub>)<sub>3</sub> (**3**) (60 mg, 0.10 mmol) was dissolved in toluene-d<sup>8</sup> (0.4 mL) and the solution was cooled to 77 K, degassed and treated with CO. After 5 min, the solution turned yellow and low temperature NMR measurements showed the formation of *trans,cis*-[Rh(*E*)-CF=CHCF<sub>3</sub>](CO)<sub>2</sub>(PEt<sub>3</sub>)<sub>2</sub> (**10**) and two unknown products (17:1:9 ratio, considering that all the products bear 2 phosphines) together with free phosphine. Then, volatiles were removed under vacuum for 1 day and an orange oil, identified as *trans*-[Rh(*E*)-CF=CHCF<sub>3</sub>](CO)(PEt<sub>3</sub>)<sub>2</sub> (**11**), was obtained. Yield: 48 mg (95%).

The synthesis of the labeled derivatives *trans,cis*-[Rh(*E*)-CF=CHCF<sub>3</sub>](<sup>13</sup>CO)<sub>2</sub>(PEt<sub>3</sub>)<sub>2</sub> (**10'**) and *trans*-[Rh(*E*)-CF=CHCF<sub>3</sub>](<sup>13</sup>CO)(PEt<sub>3</sub>)<sub>2</sub> (**11'**) was performed following the same procedure using <sup>13</sup>CO.

Analytical data for the main unknown product: <sup>1</sup>H NMR (300.1 MHz, C<sub>6</sub>D<sub>6</sub>, 213 K): δ = 5.40 (dq, <sup>3</sup>J<sub>H,F</sub> = 47.9, <sup>3</sup>J<sub>H,H</sub> = 6.7 Hz, 1H, =CH) ppm. <sup>19</sup>F NMR (282.4 MHz, C<sub>6</sub>D<sub>6</sub>, 213 K): δ = -19.4 (br, 1F, F); -55.2 (br, 3F, CF<sub>3</sub>) ppm. <sup>31</sup>P{<sup>1</sup>H} NMR (121.4 MHz, C<sub>6</sub>D<sub>6</sub>, 201 K): δ = 24.9 (d br, <sup>1</sup>J<sub>P,Rh</sub> = 121 Hz, PEt<sub>3</sub>) ppm. <sup>13</sup>C{<sup>1</sup>H} NMR (75.5 MHz, C<sub>6</sub>D<sub>6</sub>, 213 K): δ = 111 (m, observed in a <sup>1</sup>H, <sup>13</sup>C HMQC NMR spectrum, =CH) ppm.

Analytical data for **10**: <sup>1</sup>H NMR (300.1 MHz, C<sub>6</sub>D<sub>6</sub>, 213 K): δ = 5.72 (dq, <sup>3</sup>J<sub>H,F</sub> = 47.2, <sup>3</sup>J<sub>H,H</sub> = 7.75 Hz, 1H, =CH); 1.38 (m, q in a <sup>1</sup>H{<sup>31</sup>P} NMR spectrum, <sup>3</sup>J<sub>H,H</sub> = 7.4 Hz, 6H, P<sub>*cis*</sub>CH<sub>2</sub>CH<sub>3</sub>); 1.0-1.1 (m, overlapped with other PEt<sub>3</sub> resonances, P<sub>*trans*</sub>CH<sub>2</sub>CH<sub>3</sub>); 0.85 (m, t in <sup>1</sup>H{<sup>31</sup>P} NMR spectrum, <sup>3</sup>J<sub>H,H</sub> = 7.4 Hz, 9H, P<sub>*cis*</sub>CH<sub>2</sub>CH<sub>3</sub>); 0.75 (m, t in <sup>1</sup>H{<sup>31</sup>P} NMR spectrum, <sup>3</sup>J<sub>H,H</sub> = 6.4, 9H, P<sub>*trans*</sub>CH<sub>2</sub>CH<sub>3</sub>) ppm. <sup>19</sup>F NMR (282.4 MHz, C<sub>6</sub>D<sub>6</sub>, 213 K): δ = -15.4 (ddm, <sup>3</sup>J<sub>F,P</sub> = 51, <sup>3</sup>J<sub>F,H</sub> = 50 Hz, 1F, F); -54.7 (dt, <sup>4</sup>J<sub>F,F</sub> = 11, <sup>3</sup>J<sub>F,H</sub> ≈ <sup>5</sup>J<sub>F,P<sub>*cis*</sub></sub> = 7 Hz, 3F,

$CF_3$ ) ppm.  $^{31}P\{^1H\}$  NMR (121.4 MHz,  $C_6D_6$ , 213 K):  $\delta = 26.3$  (ddd,  $^1J_{P,Rh} = 74.2$ ,  $^3J_{P,F} = 51.3$ ,  $^2J_{P,P} = 32.0$  Hz, 1P,  $P_{trans}$ ); 5.34 (ddquint,  $^1J_{P,Rh} = 121.4$ ,  $^2J_{P,P} = 32.0$ ,  $^3J_{F,P} \approx ^5J_{P,F} = 5.7$  Hz, 1P,  $P_{cis}$ ) ppm.  $^{13}C\{^1H\}$  NMR (75.5 MHz,  $C_6D_6$ , 213 K):  $\delta = 123$  (m in the  $^{13}C$  domain,  $^1J_{C,F} = 256$  Hz, observed in a  $^1H$ ,  $^{13}C$  HMBC NMR spectrum,  $CF_3$ ); 110 (m, observed in a  $^1H$ ,  $^{13}C$  HMQC NMR spectrum, =CH) ppm. Note that  $PEt_3$  resonances are overlapped with the unknown products as well as the free phosphine.

Analytical data for **11**: IR ( $cm^{-1}$ ):  $\tilde{\nu} = 1959$  (s, CO), 1597 (m, C=C).  $^1H$  NMR (300.1 MHz,  $C_6D_6$ ):  $\delta = 5.02$  (dqtd,  $^3J_{H,F} = 53.8$ ,  $^3J_{H,H} = 8.4$ ,  $^4J_{H,P} = 2.4$ ,  $^3J_{H,Rh} = 0.5$  Hz, 1H, =CH); 1.63 (m, q in  $^1H\{^{31}P\}$  NMR spectrum,  $^3J_{H,H} = 7.6$ , 12H,  $PCH_2CH_3$ ); 0.99 (dt,  $^3J_{H,P} = 16.1$ ,  $^3J_{H,H} = 7.6$ , 18H,  $PCH_2CH_3$ ) ppm.  $^{19}F$  NMR (282.4 MHz,  $C_6D_6$ ):  $\delta = -43.5$  (dq,  $^3J_{F,H} = 54$ ,  $^4J_{F,F} \approx ^2J_{F,Rh} = 13$  Hz, 1F, F); -55.1 (ddt,  $^4J_{F,F} = 13$ ,  $^3J_{F,H} = 9$ ,  $^5J_{F,P} = 4$  Hz, 3F,  $CF_3$ ) ppm.  $^{31}P\{^1H\}$  NMR (121.4 MHz,  $C_6D_6$ ):  $\delta = 22.2$  (dq,  $^1J_{P,Rh} = 131.5$ ,  $^5J_{P,F} = 4.3$  Hz,  $PEt_3$ ) ppm.  $^{13}C\{^1H\}$  NMR (75.5 MHz,  $C_6D_6$ ):  $\delta = 214$  (m in the  $^{13}C$  domain,  $^1J_{C,F} = 340$ ,  $^1J_{C,Rh} = 57$ ,  $^3J_{C,F} = 17$  Hz observed in a  $^{19}F$ ,  $^{13}C$  HMBC NMR spectrum, =CF); 197 (dm in the  $^{13}C$  domain,  $^1J_{C,Rh} = 58$  Hz, observed in a  $^1H$ ,  $^{13}C$  HMBC NMR spectrum, CO); 123.2 (qm in the  $^{13}C$  domain,  $^1J_{C,F} = 272$ ,  $^3J_{C,F} = 18$  Hz, confirmed by a  $^{19}F$ ,  $^{13}C$  HMBC NMR spectrum,  $CF_3$ ); 108.0 (qqm,  $^2J_{C,F} = 30$ ,  $^2J_{C,F} \approx ^3J_{C,P} = 5$  Hz, =CH); 8.2 (s,  $PCH_2CH_3$ ); 17.6 (vt d,  $N = |^1J_{C,P} + ^3J_{C,P} = 13|$ ,  $^2J_{C,Rh} = 1.3$  Hz,  $PCH_2CH_3$ ) ppm.

Selected analytical data for **10'**:  $^{31}P\{^1H\}$  NMR (121.4 MHz,  $C_6D_6$ , 201 K):  $\delta = 26.3$  (dddt,  $^1J_{P,Rh} = 74.2$ ,  $^3J_{P,F} = 51.3$ ,  $^2J_{P,P} = 32.0$ ,  $^2J_{P,C} = 17.5$  Hz, 1P,  $P_{trans}$ ); 5.34 (dq br,  $^1J_{P,Rh} = 121.4$ ,  $^2J_{P,P} \approx ^2J_{P,C} = 30.0$ , Hz, 1P,  $P_{cis}$ ) ppm.  $^{13}C\{^1H\}$  NMR (75.5 MHz,  $C_6D_6$ , 201 K):  $\delta = 198.3$  (ddt,  $^1J_{C,Rh} = 69.0$ ,  $^2J_{C,Pc} = 28.7$ ,  $^2J_{C,Pt} = ^3J_{C,F} = 17.7$  Hz, CO) ppm.

Selected analytical data for **11'**: IR ( $cm^{-1}$ ):  $\tilde{\nu} = 1917$  (s,  $^{13}CO$ ), 1599 (m, C=C).  $^{19}F$  NMR (282.4 MHz,  $C_6D_6$ ):  $\delta = -43.5$  (dsext,  $^3J_{F,H} = 54$ ,  $^4J_{F,F} \approx ^3J_{F,C} \approx ^2J_{F,Rh} = 13$  Hz, 1F, F); -55.1 (ddt,  $^4J_{F,F} = 13$ ,  $^3J_{F,H} = 9$ ,  $^5J_{F,P} = 4$  Hz, 3F,  $CF_3$ ) ppm.  $^{31}P\{^1H\}$  NMR (121.4 MHz,  $C_6D_6$ ):  $\delta = 22.2$  (ddq,  $^1J_{P,Rh} = 131.5$ ,  $^2J_{P,C} = 14.2$ ,  $^5J_{P,F} = 4.3$  Hz,  $PEt_3$ ) ppm.  $^{13}C\{^1H\}$  NMR (75.5 MHz,  $C_6D_6$ , 201 K):  $\delta = 196.6$  (dtd,  $^1J_{C,Rh} = 55.6$ ,  $^2J_{C,P} = 13.9$ ,  $^3J_{C,F} = 12.5$  Hz, CO); 17.6 (vt t,  $N = |^1J_{C,P} + ^3J_{C,P} = 13|$ ,  $^2J_{C,Rh} \approx ^3J_{C,C} = 1.3$  Hz,  $PCH_2CH_3$ ) ppm.



### Reaction of [Rh(C≡CCF<sub>3</sub>)(CO)(PEt<sub>3</sub>)<sub>3</sub>] (**12**) with NEt<sub>3</sub>·3HF or HBF<sub>4</sub>·Et<sub>2</sub>O

Complex [Rh(C≡CCF<sub>3</sub>)(CO)(PEt<sub>3</sub>)<sub>3</sub>] (**12**) (0.06 mmol) was dissolved in CD<sub>2</sub>Cl<sub>2</sub> (0.4 mL) and excess of NEt<sub>3</sub>·3HF (7 μL, 0.04 mmol) or HBF<sub>4</sub>·Et<sub>2</sub>O (12 μL, 0.08 mmol) was added at around 243 K. The reaction mixture was slowly warmed up to room temperature. After 1 day 85% conversion of complex **12** to yield mainly [Rh{(Z)-C(PEt<sub>3</sub>)=CHCF<sub>3</sub>}(CO)(PEt<sub>3</sub>)<sub>2</sub>]BF<sub>4</sub> (**13**·BF<sub>4</sub>) with HBF<sub>4</sub>·Et<sub>2</sub>O was observed, while for HF, an 80% conversion to **13**·FHF as the main product was obtained. When HBF<sub>4</sub> is used, another complex, which might be [Rh(CO)(PEt<sub>3</sub>)<sub>3</sub>]BF<sub>4</sub> was detected. Note that the reaction with NEt<sub>3</sub>·3HF was performed in a PFA inliner.

Analytical data for **13**: IR (cm<sup>-1</sup>):  $\tilde{\nu}$  1950 (s, CO). <sup>1</sup>H NMR (300.1 MHz, CD<sub>2</sub>Cl<sub>2</sub>):  $\delta$  = 6.63 (dq, <sup>3</sup>J<sub>H,P</sub> = 36.4, <sup>3</sup>J<sub>H,F</sub> = 6.3, <sup>4</sup>J<sub>H,P</sub> ≈ <sup>3</sup>J<sub>H,Rh</sub> = 3.9 Hz, 1H, =CH) ppm; the resonances corresponding to the phosphine ligands are overlapped with the signals for the other products. <sup>19</sup>F NMR (282.4 MHz, CD<sub>2</sub>Cl<sub>2</sub>):  $\delta$  = -63.3 (q br, <sup>3</sup>J<sub>F,H</sub> ≈ <sup>5</sup>J<sub>F,Pcis</sub> = 4 Hz, 3F, CF<sub>3</sub>) ppm. <sup>31</sup>P{<sup>1</sup>H} NMR (121.4 MHz, CD<sub>2</sub>Cl<sub>2</sub>):  $\delta$  = 37.1 (dt, <sup>2</sup>J<sub>P,Rh</sub> = 4.8, <sup>3</sup>J<sub>P,P</sub> = 2.4 Hz, 1P, =CPEt<sub>3</sub>); 14.5 (dq, <sup>1</sup>J<sub>P,Rh</sub> = 125.0, <sup>5</sup>J<sub>P,F</sub> = 5.2, <sup>3</sup>J<sub>P,P</sub> = 2.6 Hz, 2P, RhPEt<sub>3</sub>) ppm. <sup>13</sup>C{<sup>1</sup>H} NMR (75.5 MHz, CD<sub>2</sub>Cl<sub>2</sub>):  $\delta$  = 192 (m, observed in a <sup>1</sup>H, <sup>13</sup>C HMBC NMR spectrum, CO); 166 (m, observed in a <sup>1</sup>H, <sup>13</sup>C HMBC NMR spectrum, =CPEt<sub>3</sub>); 122 (qm in the <sup>13</sup>C domain, <sup>1</sup>J<sub>C,F</sub> = 260 Hz, observed in a <sup>1</sup>H, <sup>13</sup>C HMBC NMR spectrum, CF<sub>3</sub>); 136 (qm in the <sup>13</sup>C domain, <sup>2</sup>J<sub>C,F</sub> = 37 Hz, observed in a <sup>1</sup>H, <sup>13</sup>C HMQC NMR spectrum, =CH) ppm.

### Reaction of [Rh(C≡CCF<sub>3</sub>)(PEt<sub>3</sub>)<sub>3</sub>] (**6**) with Et<sub>3</sub>N·3HF

In an NMR tube equipped with a PFA inliner [Rh(C≡CCF<sub>3</sub>)(PEt<sub>3</sub>)<sub>3</sub>] (**6**) (23 mg, 0.042 mmol) was dissolved in C<sub>6</sub>D<sub>6</sub> (0.3 mL). Then, excess of NEt<sub>3</sub>·3HF (15 μL, 0.092 mmol) was added to the solution. After 5 minutes at room temperature, the NMR spectroscopic data of the reaction mixture revealed 36% conversion of **6** into [Rh{F(HF)<sub>2</sub>}(PEt<sub>3</sub>)<sub>3</sub>] (**5**) (see above). After one day, full conversion was achieved. In addition of complex **5** the release of Z-1,3,3,3-tetrafluoropropene and other fluorinated compounds was observed.

### Synthesis of $[\text{Rh}(\text{F})(\text{PR}_3)_2]_2$ (**14**) $\text{R} = i\text{Pr}$ (**a**), $\text{Et}$ (**b**)

$[\text{Rh}(\text{F})(\text{cyclooctene})_2]_2$  (150 mg, 0.22 mmol) was dissolved in THF (10 mL) and the corresponding phosphine was added (4 eq., 0.88 mmol). The dark red solution was stirred for 1h and then the volatiles were removed under vacuum. The obtained product was washed with cold pentane (2 x 5 mL) and dried under vacuum. Complex **14a** was obtained as a dark red solid while **14b** is a brownish oil. Both complexes were identified by comparison with literature.<sup>9,10</sup> Yield: 171 mg (88% for **14a**); 134 mg (85% for **14b**).

### Reactivity of $[\text{Rh}(\text{F})(\text{P}i\text{Pr}_3)_2]_2$ (**14a**) with 3,3,3-trifluoropropyne

In a Young NMR tube  $[\text{Rh}(\text{F})(\text{P}i\text{Pr}_3)_2]_2$  (**14a**) (50 mg, 0.056 mmol) was dissolved in  $\text{C}_6\text{D}_6$  (0.4 mL). The reaction mixture was frozen to 77 K, the NMR tube was degassed *in vacuo*, and pressurized with 3,3,3-tetrafluoropropyne (13 mg, 0.14 mmol). After warming up to room temperature the NMR spectroscopic data of the reaction mixture revealed after 5 min the full conversion of **14a** into  $[\text{Rh}(\text{F})(\text{CH}\equiv\text{CCF}_3)(\text{P}i\text{Pr}_3)_2]$  (**15**) together with small unknown impurities.

Analytical data of **15**: IR ( $\text{cm}^{-1}$ ):  $\tilde{\nu}$  1810 (m,  $\text{C}\equiv\text{C}$ ).  $^1\text{H}$  NMR (300.1 MHz,  $\text{C}_6\text{D}_6$ ):  $\delta = 4.52$  (qd,  $^4J_{\text{H,F}} = 4.0$ ,  $^2J_{\text{H,Rh}} = 1.5$  Hz, 1H,  $\equiv\text{CH}$ ); 2.11 (m, sept in  $^1\text{H}\{^{31}\text{P}\}$  NMR spectrum,  $^3J_{\text{H,H}} = 7.2$  Hz, 6H,  $\text{PCH}(\text{CH}_3)_2$ ); 1.32 (m, d in  $^1\text{H}\{^{31}\text{P}\}$  NMR spectrum,  $^3J_{\text{H,H}} = 7.0$  Hz, 18H,  $\text{PCH}(\text{CH}_3)_2$ ); 1.17 (m, d in  $^1\text{H}\{^{31}\text{P}\}$  NMR spectrum,  $^3J_{\text{H,H}} = 7.0$  Hz, 18H,  $\text{PCH}(\text{CH}_3)_2$ ) ppm.  $^{19}\text{F}$  NMR (282.4 MHz, Tol- $d_8$ ):  $\delta = -47.7$  (dq,  $^4J_{\text{F,H}} = 4$ ,  $^4J_{\text{F,P}} \approx ^3J_{\text{F,Rh}} = 2$  Hz, 3F,  $\text{CF}_3$ ); -242.9 (m br, d br at 233 K,  $^1J_{\text{F,Rh}} = 87$  Hz, 1F, RhF) ppm.  $^{31}\text{P}\{^1\text{H}\}$  NMR (121.4 MHz, Tol- $d_8$ ):  $\delta = 36.4$  (d,  $^1J_{\text{P,Rh}} = 119.0$  Hz,  $\text{P}i\text{Pr}_3$ ) ppm.  $^{31}\text{P}\{^1\text{H}\}$  NMR (121.4 MHz, Tol- $d_8$ , 233 K):  $\delta = 36.4$  (dd,  $^1J_{\text{P,Rh}} = 119.0$ ,  $^3J_{\text{P,F}} = 10.3$  Hz,  $\text{P}i\text{Pr}_3$ ) ppm.  $^{13}\text{C}\{^1\text{H}\}$  NMR (75.5 MHz,  $\text{C}_6\text{D}_6$ ):  $\delta = 83$  (m, observed in a  $^1\text{H},^{13}\text{C}$  HMQC NMR spectrum,  $\equiv\text{CH}$ ); 61 (dm in the  $^{13}\text{C}$  domain,  $^2J_{\text{C,F}} = 40$  Hz, observed in a  $^1\text{H},^{13}\text{C}$  HMBC NMR spectrum,  $\equiv\text{CCF}_3$ ); 21 (m, observed in a  $^1\text{H},^{13}\text{C}$  HMQC NMR spectrum,  $\text{PCH}(\text{CH}_3)_2$ ); 19.3 (m, observed in a  $^1\text{H},^{13}\text{C}$  HMQC NMR spectrum,  $\text{PCH}(\text{CH}_3)_2$ ); 18.9 (m, observed in a  $^1\text{H},^{13}\text{C}$  HMQC NMR spectrum,  $\text{PCH}(\text{CH}_3)_2$ ) ppm.

### Rearrangement of $[\text{Rh}(\text{F})(\text{CH}\equiv\text{CCF}_3)(\text{P}i\text{Pr}_3)_2]$ (**15**) in the presence of phosphine

In an NMR tube  $[\text{Rh}(\text{F})(\text{CH}\equiv\text{CCF}_3)(\text{P}i\text{Pr}_3)_2]$  (**15**) (30 mg, 0.055 mmol) was dissolved in  $\text{C}_6\text{D}_6$  (0.4 mL). Then, excess of  $\text{P}i\text{Pr}_3$  (23  $\mu\text{L}$ , 0.12 mmol) was added to the solution. Complex **15**

slowly converted into complex  $[\text{Rh}(\text{F})(=\text{C}=\text{CHCF}_3)(\text{P}i\text{Pr}_3)_2]$  (**16**). After 3 weeks at room temperature, the NMR spectroscopic data of the reaction mixture revealed full conversion of **15** into **16** together with some impurities. Using of  $\text{NEt}_3$  instead of the phosphine did not reduce the reaction time.

Analytical data of **16**: IR ( $\text{cm}^{-1}$ ):  $\tilde{\nu}$  1638 (m, C=C). LIFDI (Toluene):  $m/z$  517  $[\text{M}-\text{F}]^+$ .  $^1\text{H}$  NMR (300.1 MHz,  $\text{C}_6\text{D}_6$ ):  $\delta$  = 2.51 (m, sept in  $^1\text{H}\{^{31}\text{P}\}$  NMR spectrum,  $^3J_{\text{H,H}} = 7.2$  Hz, 6H,  $\text{PCH}(\text{CH}_3)_2$ ); 1.25 (dvt, d in  $^1\text{H}\{^{31}\text{P}\}$  NMR spectrum,  $^3J_{\text{H,H}} = 7.1$  Hz, 36H,  $\text{PCH}(\text{CH}_3)_2$ ); 0.67 (m, 1H, =CH) ppm.  $^{19}\text{F}$  NMR (282.4 MHz,  $\text{C}_6\text{D}_6$ ):  $\delta$  = -52.2 (dt,  $^3J_{\text{F,H}} = 7$ ,  $^5J_{\text{F,P}} = 3$  Hz, 3F,  $\text{CF}_3$ ); -208 (tdd,  $^2J_{\text{F,P}} = 20$ ,  $^1J_{\text{F,Rh}} = 11$ ,  $^4J_{\text{F,H}} = 8$  Hz, 1F, RhF) ppm.  $^{31}\text{P}\{^1\text{H}\}$  NMR (121.4 MHz,  $\text{C}_6\text{D}_6$ ):  $\delta$  = 46.6 (ddq,  $^1J_{\text{P,Rh}} = 139.9$ ,  $^2J_{\text{P,F}} = 20.4$ ,  $^5J_{\text{P,F}} = 2.7$  Hz,  $\text{P}i\text{Pr}_3$ ) ppm.  $^{19}\text{F},^{13}\text{C}$  HMBC NMR (282.4 / 75.5 MHz,  $\text{C}_6\text{D}_6$ ):  $\delta$  = -52/282 (m, Rh=C=C); -52/116 (m in  $^{13}\text{C}$  domain,  $^1J_{\text{C,H}} = 153$ ,  $^1J_{\text{C,F}} = 268$  Hz,  $\text{CF}_3$ ); -52/104 (d in  $^{19}\text{F}$  domain, m in  $^{13}\text{C}$  domain,  $^1J_{\text{C,H}} = 153$ ,  $^2J_{\text{C,F}} = 35$  Hz, =CH) ppm.

#### Reaction of $[\text{Rh}(\text{F})(=\text{C}=\text{CHCF}_3)(\text{P}i\text{Pr}_3)_2]$ (**16**) with $\text{PEt}_3$

In a NMR tube  $[\text{Rh}(\text{F})(=\text{C}=\text{CHCF}_3)(\text{P}i\text{Pr}_3)_2]$  (**16**) (20 mg, 0.037 mmol) was dissolved in  $\text{C}_6\text{D}_6$  (0.4 mL). Then, excess of  $\text{PEt}_3$  (37  $\mu\text{L}$ , 0.25 mmol) was added to the solution. After 1 hour at room temperature the NMR spectroscopic data of the reaction mixture revealed the full conversion of **16** into  $[\text{Rh}\{\text{F}(\text{HF})_2\}(\text{PEt}_3)_3]$  (**5**) and  $[\text{Rh}(\text{C}\equiv\text{CCF}_3)(\text{PEt}_3)_3]$  (**6**) (1:1 ratio) as well as the release of  $\text{P}i\text{Pr}_3$  and small amounts of 3,3,3-trifluoropropene.

## NMR Spectra

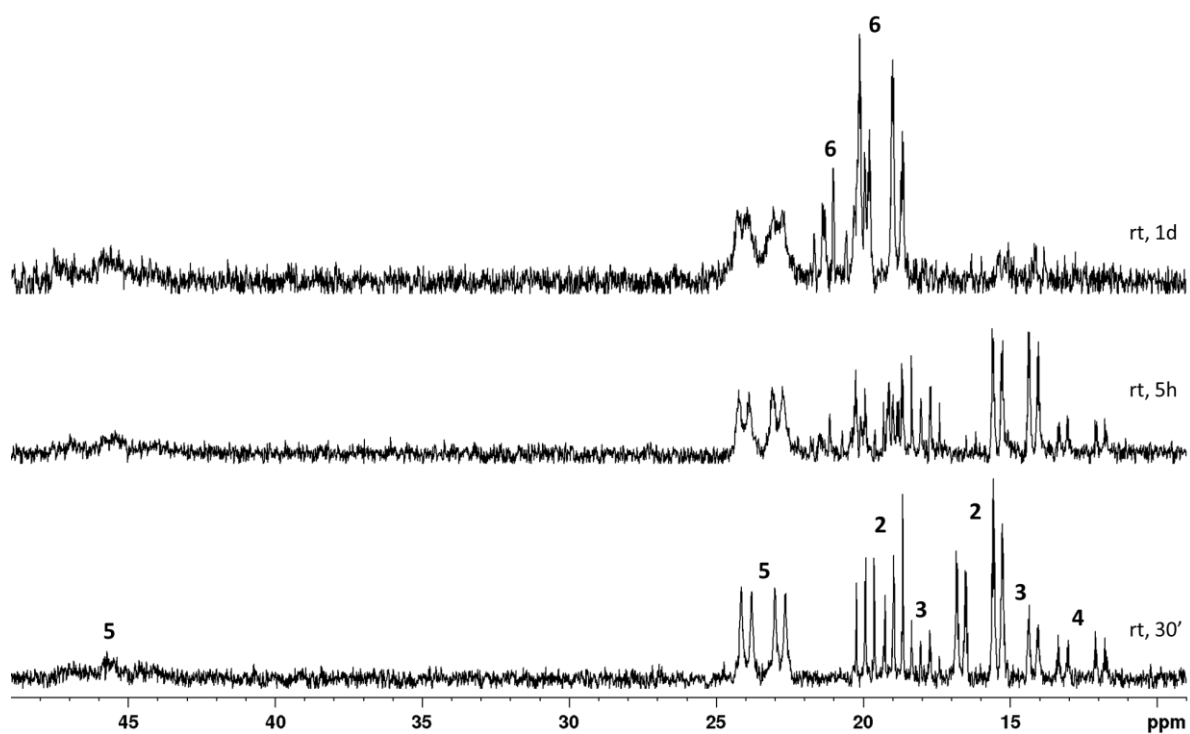

**S1.**  $^{31}\text{P}\{^1\text{H}\}$  NMR spectrum of the reaction of Z-1,3,3,3-tetrafluoropropene with  $[\text{Rh}(\text{H})(\text{PEt}_3)_3]$  (1) in  $\text{C}_6\text{D}_6$  at different times.

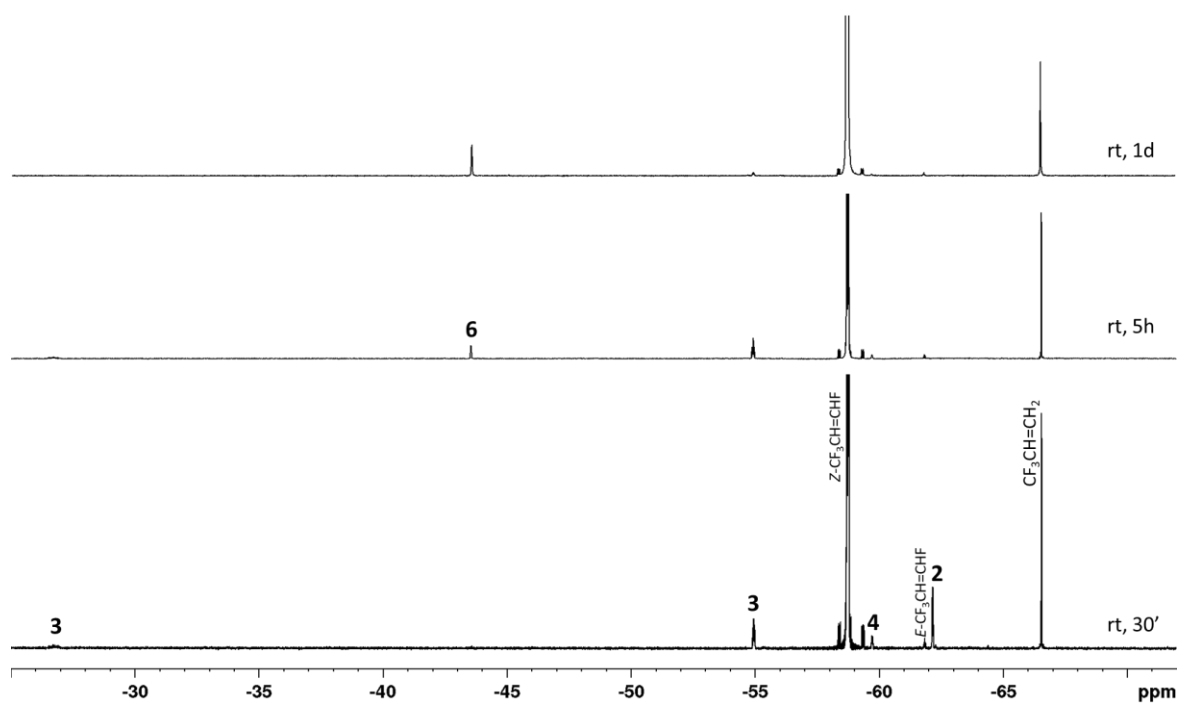

**S2.**  $^{19}\text{F}$  NMR spectrum of the reaction of Z-1,3,3,3-tetrafluoropropene with  $[\text{Rh}(\text{H})(\text{PEt}_3)_3]$  (1) in  $\text{C}_6\text{D}_6$  at different times.

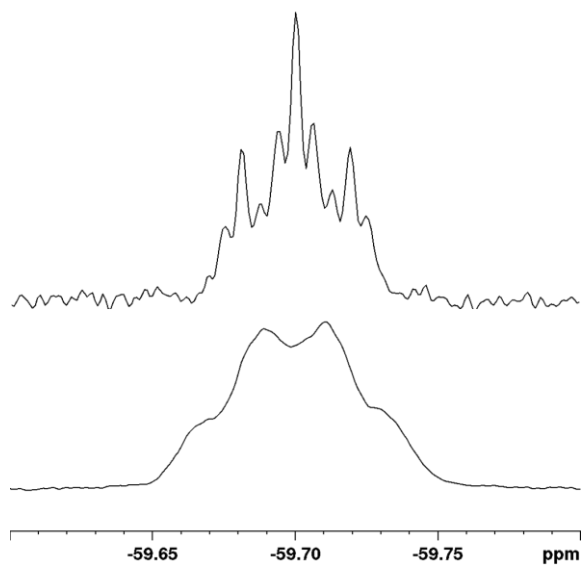

**S3.** Section of the  $^{19}\text{F}$  NMR (bottom) and  $^{19}\text{F}\{^1\text{H}\}$  NMR spectra corresponding to complex  $[\text{Rh}\{(\text{Z})\text{-CH=CHCF}_3\}(\text{PEt}_3)_3]$  (**4**) in  $\text{C}_6\text{D}_6$ .

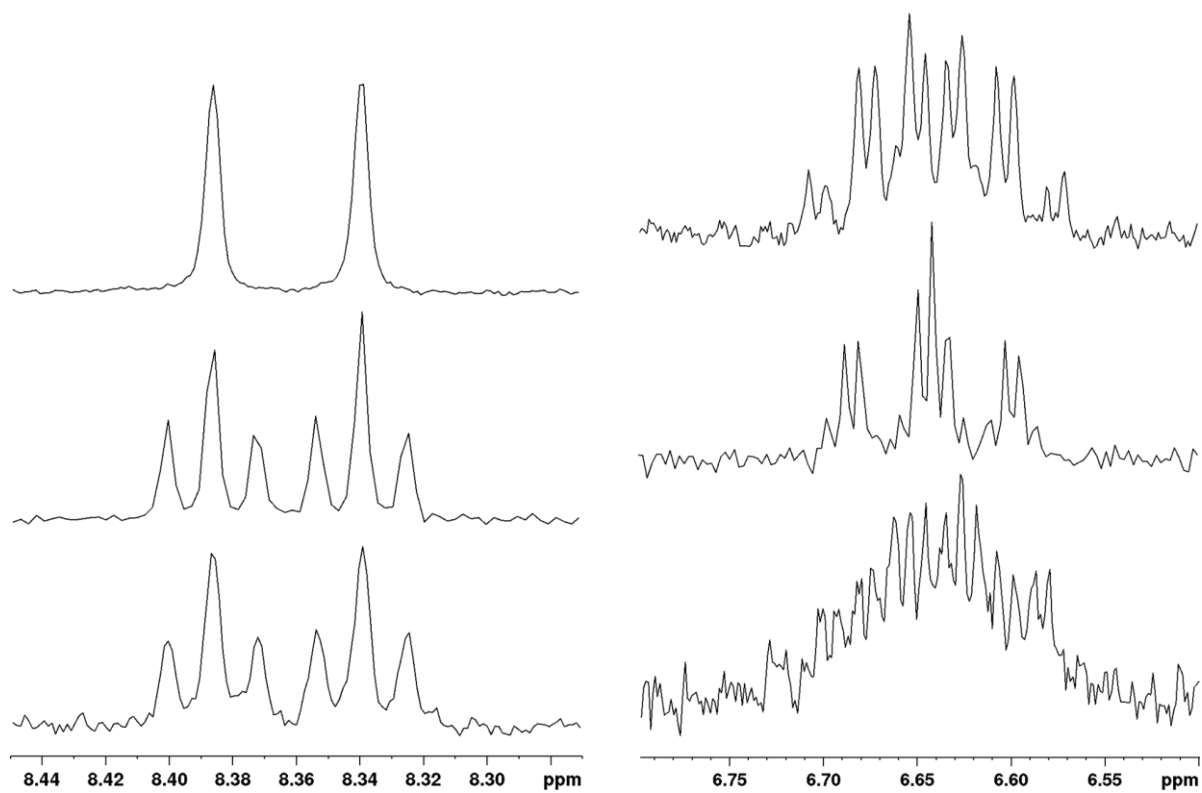

**S4.** Parts of the  $^1\text{H}$  (bottom),  $^1\text{H}\{^{19}\text{F}\}$  (middle) and  $^1\text{H}\{^{31}\text{P}\}$  (top) NMR spectra corresponding to complex  $[\text{Rh}\{(\text{Z})\text{-CH=CHCF}_3\}(\text{PEt}_3)_3]$  (**4**) in  $\text{C}_6\text{D}_6$ .

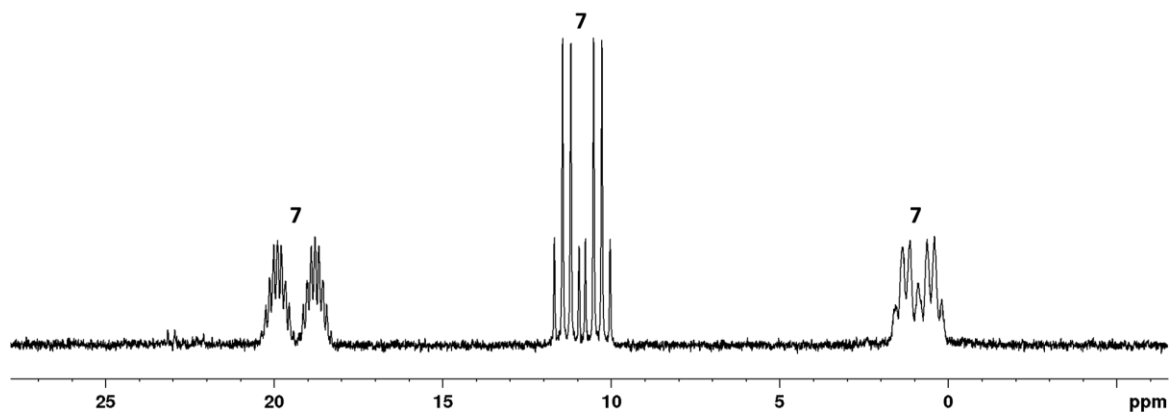

**S5.**  $^{31}\text{P}\{^1\text{H}\}$  NMR spectrum of the reaction of Z-1,3,3,3-tetrafluoropropene with  $[\text{Rh}(\text{H})(\text{PEt}_3)_3]$  (**1**) in toluene- $\text{d}^8$  at 233 K.

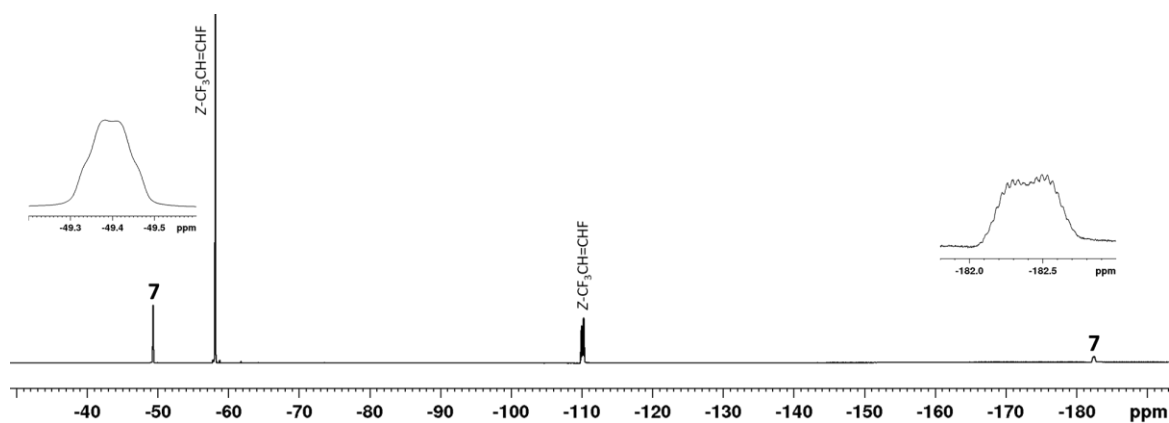

**S6.**  $^{19}\text{F}$  NMR spectrum of the reaction of Z-1,3,3,3-tetrafluoropropene with  $[\text{Rh}(\text{H})(\text{PEt}_3)_3]$  (**1**) in toluene- $\text{d}^8$  at 233 K.

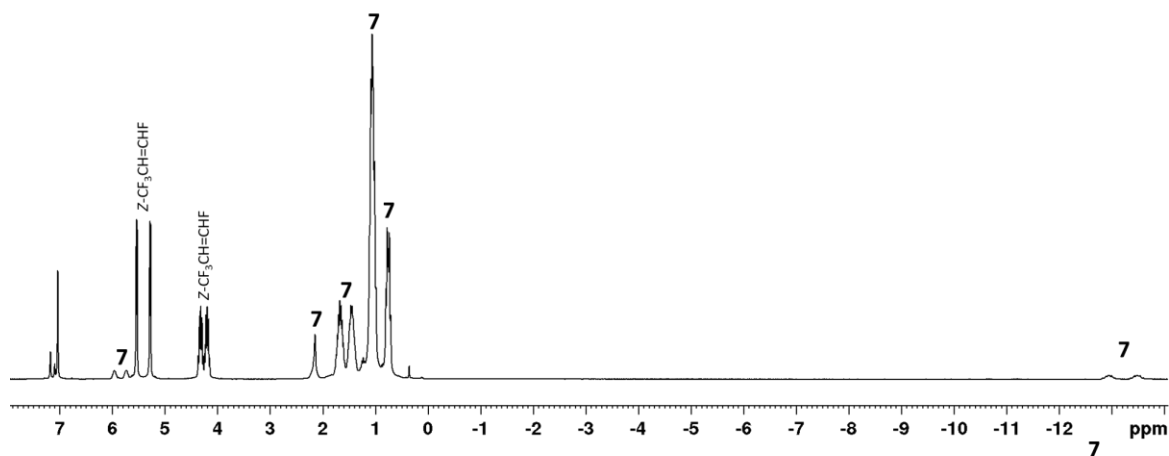

**S7.**  $^1\text{H}$  NMR spectrum of the reaction of Z-1,3,3,3-tetrafluoropropene with  $[\text{Rh}(\text{H})(\text{PEt}_3)_3]$  (**1**) in toluene- $\text{d}^8$  at 233 K.

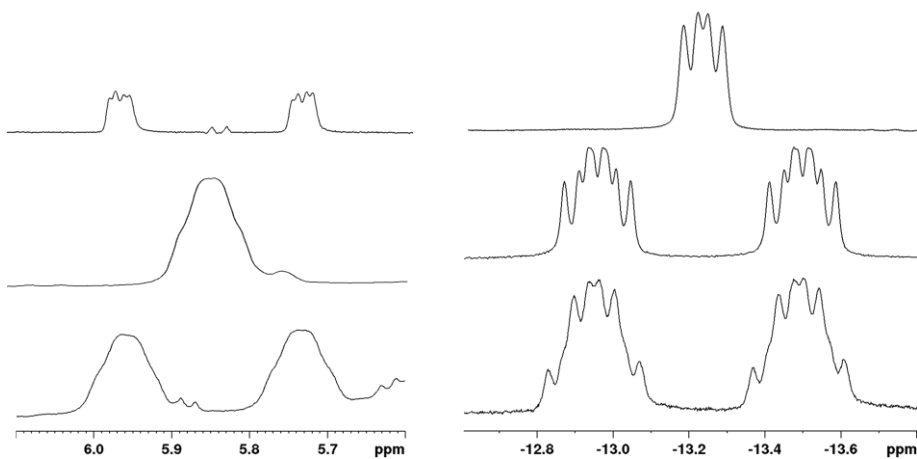

**S8.** Parts of the  $^1\text{H}$  (bottom),  $^1\text{H}\{^{19}\text{F}\}$  (middle) and  $^1\text{H}\{^{31}\text{P}\}$  (top) NMR spectra corresponding to complex *fac*- $[\text{Rh}(\text{H})(\text{CF}_3\text{CHCHF})(\text{PEt}_3)_3]$  (**7**) in toluene- $d_8$ .

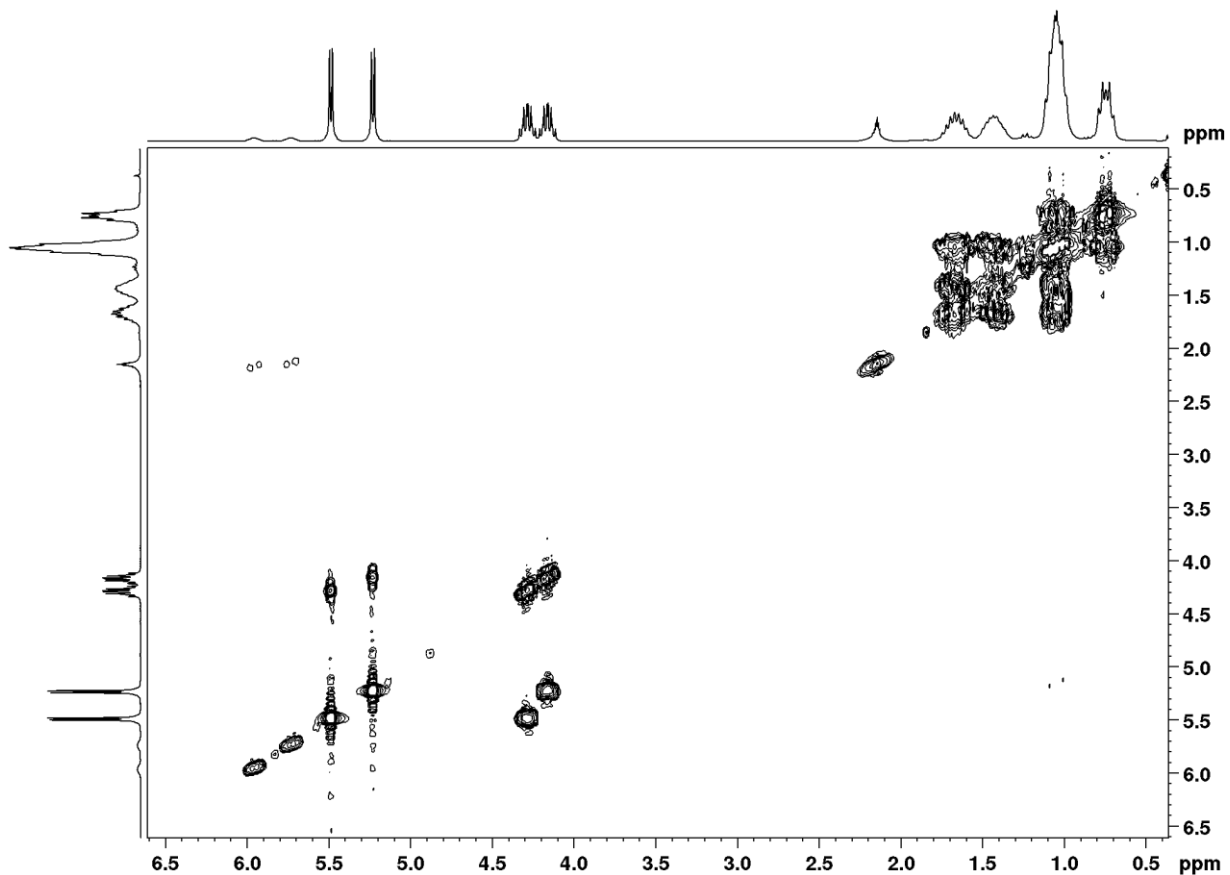

**S9.**  $^1\text{H}$   $^1\text{H}$  COSY NMR spectrum of the reaction of Z-1,3,3,3-tetrafluoropropene with  $[\text{Rh}(\text{H})(\text{PEt}_3)_3]$  (**1**) in toluene- $d_8$  at 223 K.

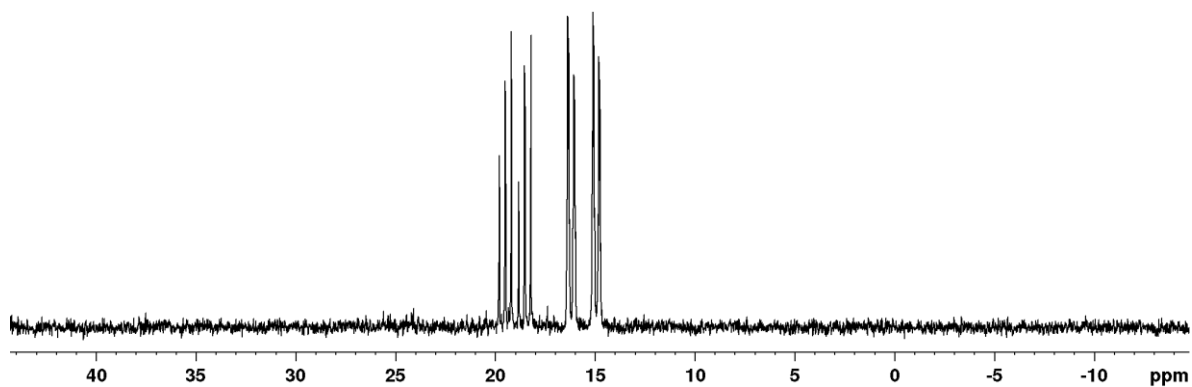

**S10.**  $^{31}\text{P}\{^1\text{H}\}$  NMR spectrum of complex  $[\text{Rh}\{(E)\text{-CH=CHCF}_3\}(\text{PEt}_3)_3]$  (**2**) in  $\text{C}_6\text{D}_6$ .

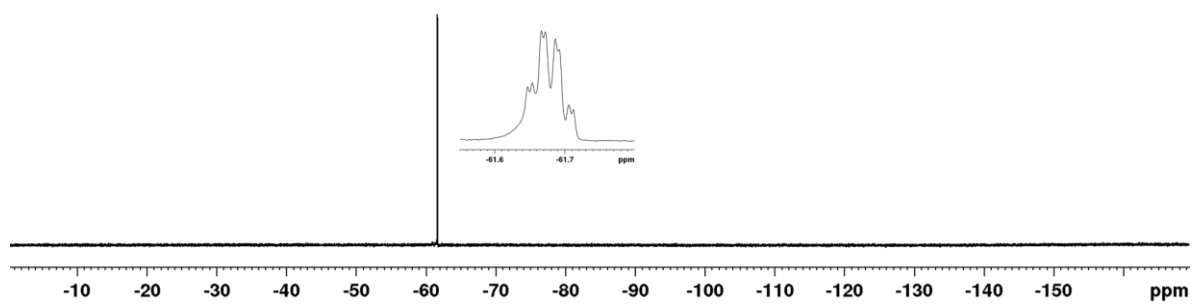

**S11.**  $^{19}\text{F}$  NMR spectrum of complex  $[\text{Rh}\{(E)\text{-CH=CHCF}_3\}(\text{PEt}_3)_3]$  (**2**) in  $\text{C}_6\text{D}_6$ .

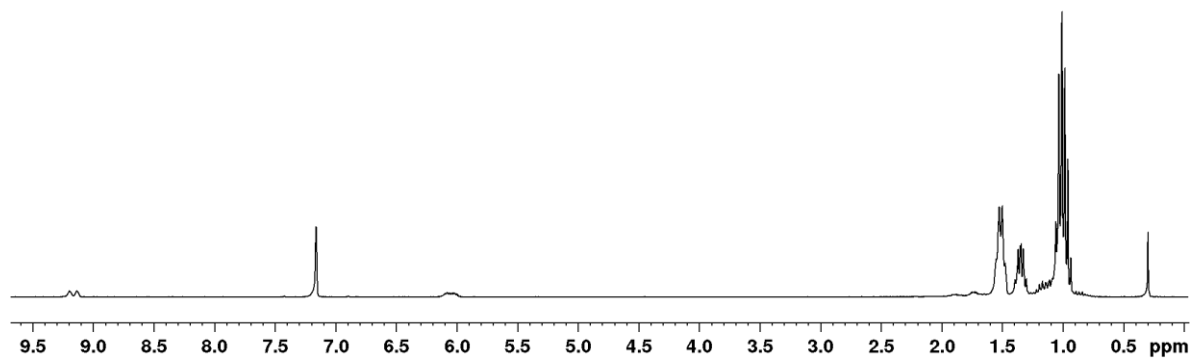

**S12.**  $^1\text{H}$  NMR spectrum of complex  $[\text{Rh}\{(E)\text{-CH=CHCF}_3\}(\text{PEt}_3)_3]$  (**2**) in  $\text{C}_6\text{D}_6$ .



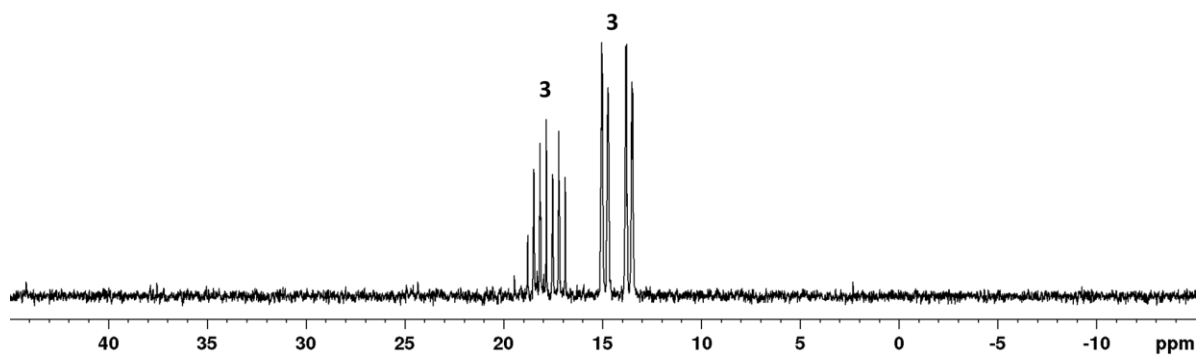

**S13.**  $^{31}\text{P}\{^1\text{H}\}$  NMR spectrum of the reaction of complex  $[\text{Rh}\{(E)\text{-CH=CHCF}_3\}(\text{PEt}_3)_3]$  (**2**) with *Z*-1,3,3,3-tetrafluoropropene in  $\text{C}_6\text{D}_6$ .

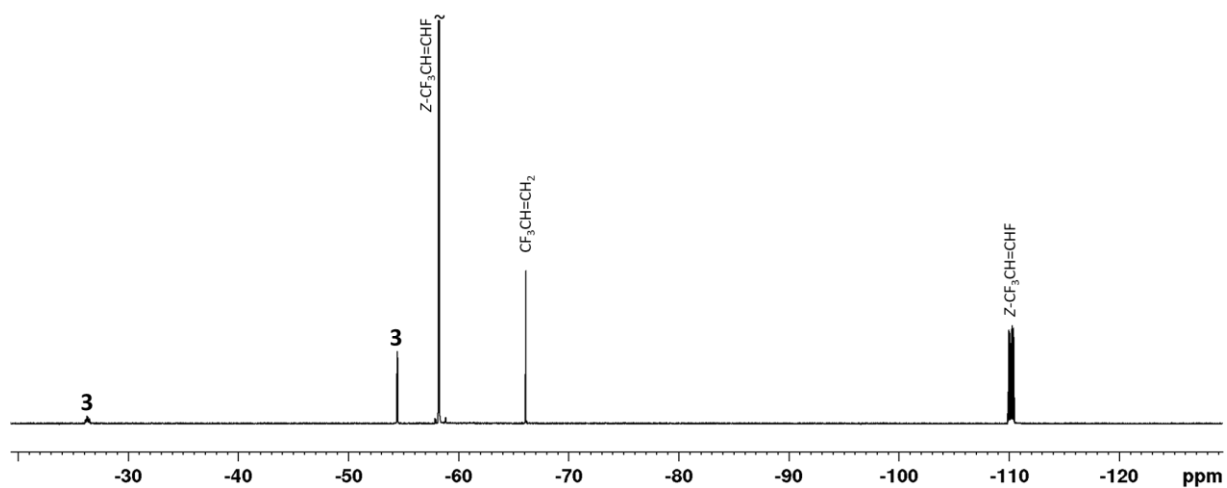

**S14.**  $^{19}\text{F}$  NMR spectrum of the reaction of complex  $[\text{Rh}\{(E)\text{-CH=CHCF}_3\}(\text{PEt}_3)_3]$  (**2**) with *Z*-1,3,3,3-tetrafluoropropene in  $\text{C}_6\text{D}_6$ .

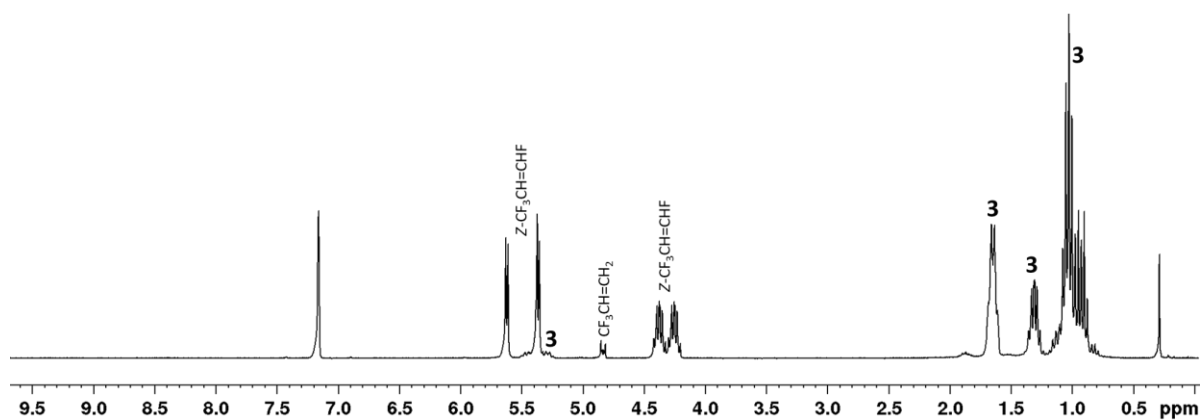

**S15.**  $^1\text{H}$  NMR spectrum of the reaction of complex  $[\text{Rh}\{(E)\text{-CH=CHCF}_3\}(\text{PEt}_3)_3]$  (**2**) with *Z*-1,3,3,3-tetrafluoropropene in  $\text{C}_6\text{D}_6$ .

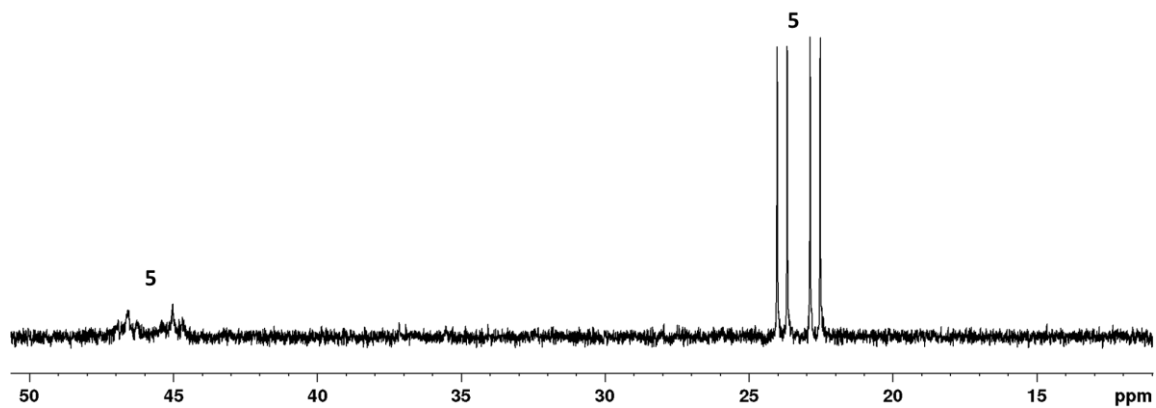

**S16.**  $^{31}\text{P}\{^1\text{H}\}$  NMR spectrum of the reaction of complex  $[\text{Rh}\{(E)\text{-CH=CHCF}_3\}(\text{PEt}_3)_3]$  (**2**) with  $\text{Et}_3\text{N}\cdot 3\text{HF}$  in  $\text{C}_6\text{D}_6$ .

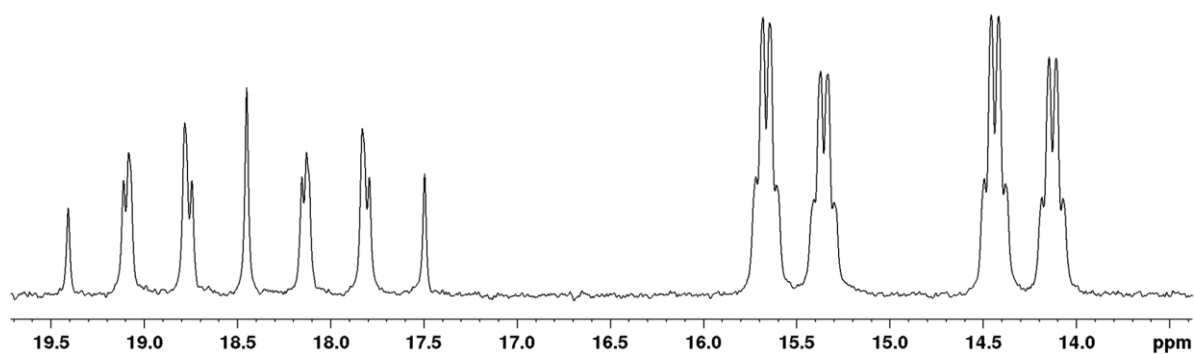

**S17.**  $^{31}\text{P}\{^1\text{H}\}$  NMR spectrum of complex  $[\text{Rh}\{(E)\text{-CF=CHCF}_3\}(\text{PEt}_3)_3]$  (**3**) in  $\text{C}_6\text{D}_6$ .

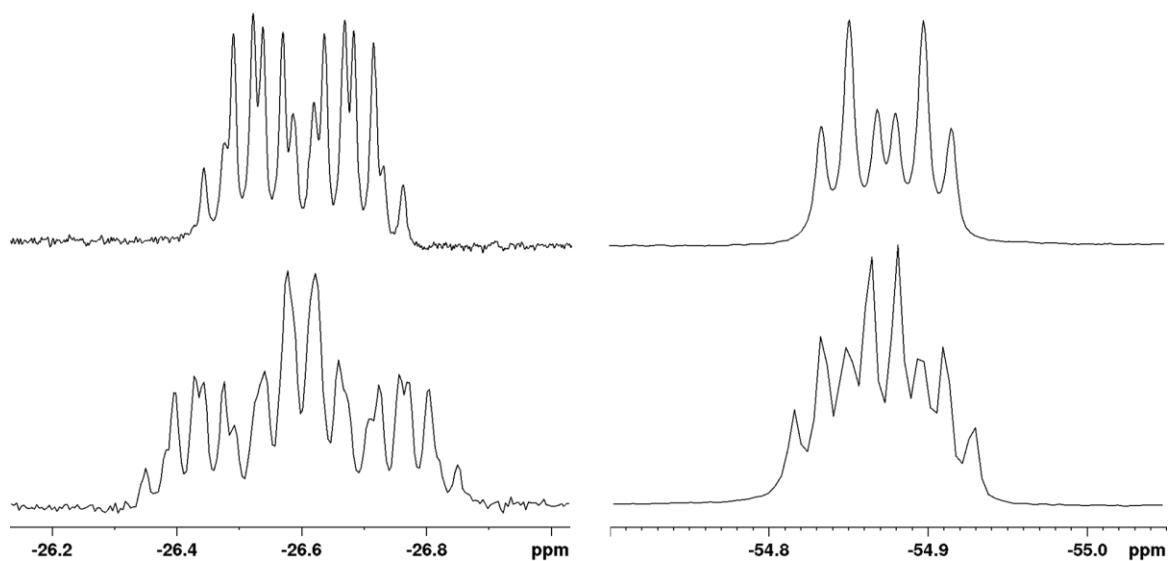

**S18.**  $^{19}\text{F}$  (bottom) and  $^{19}\text{F}\{^1\text{H}\}$  (top) NMR spectrum of complex  $[\text{Rh}\{(E)\text{-CF=CHCF}_3\}(\text{PEt}_3)_3]$  (**3**) in  $\text{C}_6\text{D}_6$ .

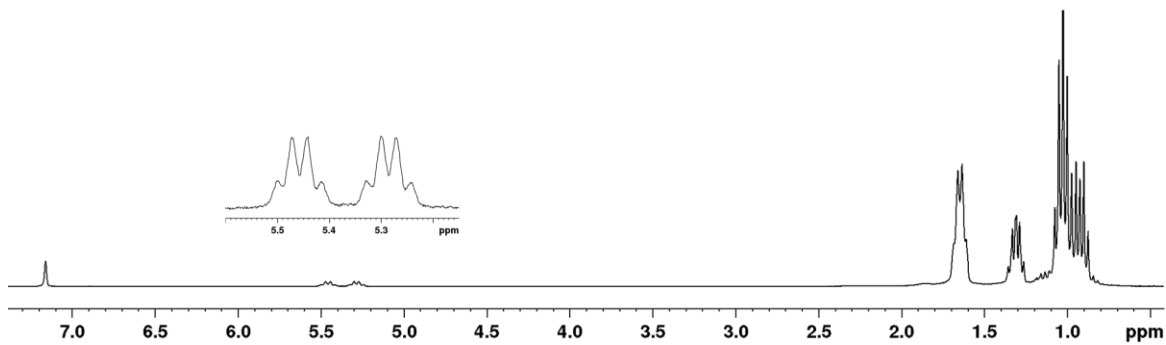

**S19.**  $^1\text{H}$  NMR spectrum of complex  $[\text{Rh}\{\textit{E}\text{-CF=CHCF}_3\}(\text{PEt}_3)_3]$  (**3**) in  $\text{C}_6\text{D}_6$ .

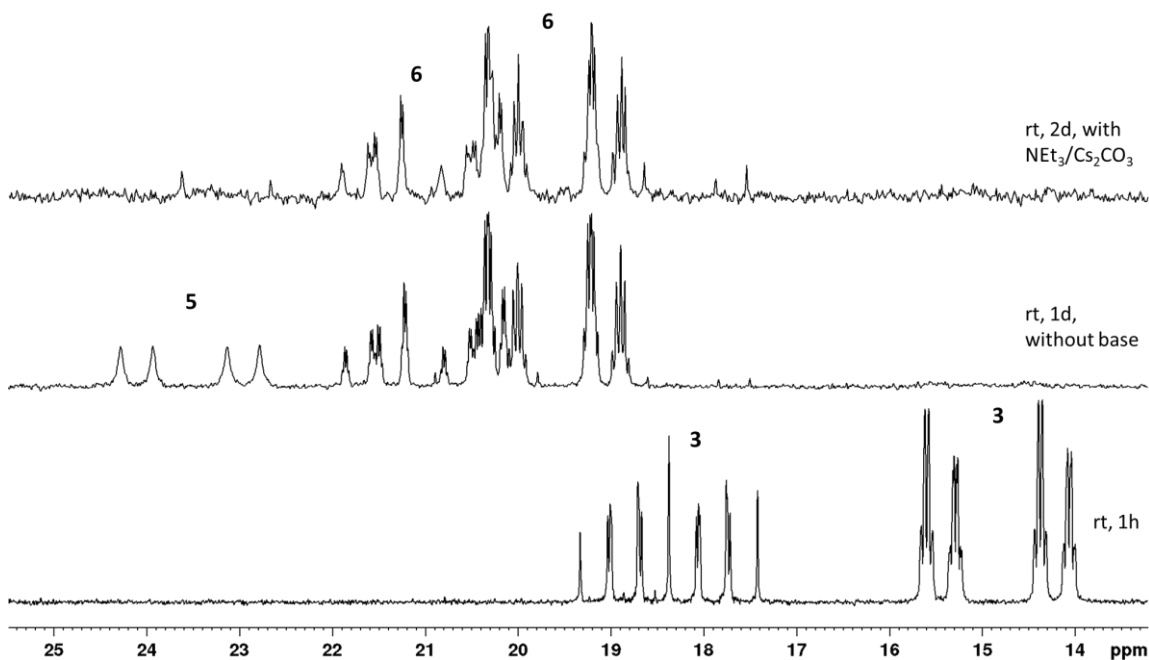

**S20.** Section of  $^{31}\text{P}\{^1\text{H}\}$  NMR spectra of the reaction of *Z*-1,3,3,3-tetrafluoropropene with  $[\text{Rh}(\text{CH}_3)(\text{PEt}_3)_3]$  (**8**) in  $\text{C}_6\text{D}_6$  at different times with and without presence of base.

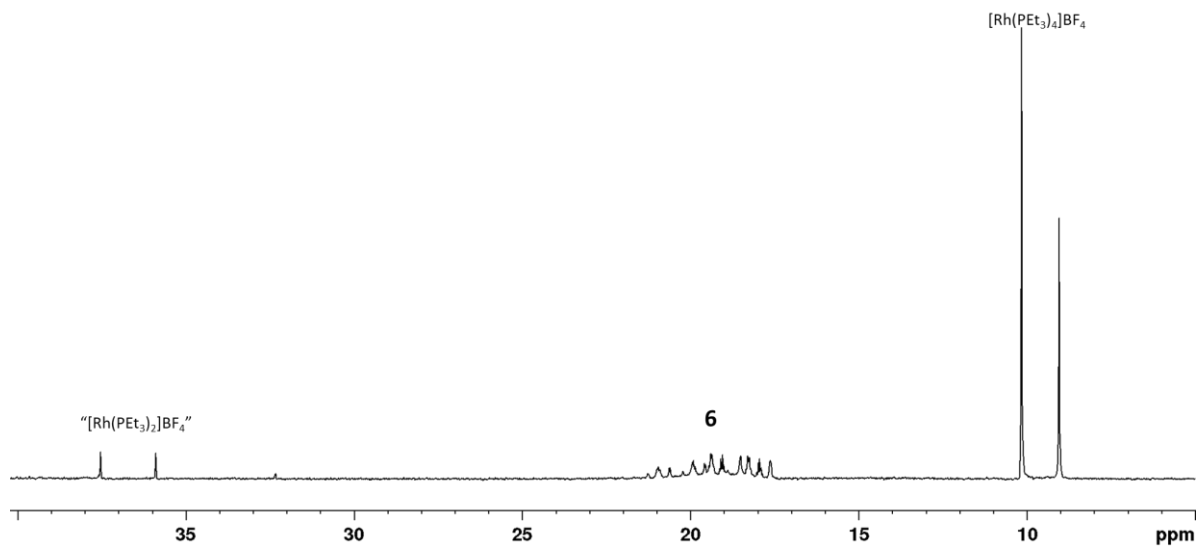

**S21.** <sup>31</sup>P{<sup>1</sup>H} NMR spectrum of the reaction of complex [Rh{(E)-CF=CHCF<sub>3</sub>}(PEt<sub>3</sub>)<sub>3</sub>] (**3**) with BF<sub>3</sub> at 263 K in CD<sub>2</sub>Cl<sub>2</sub>.

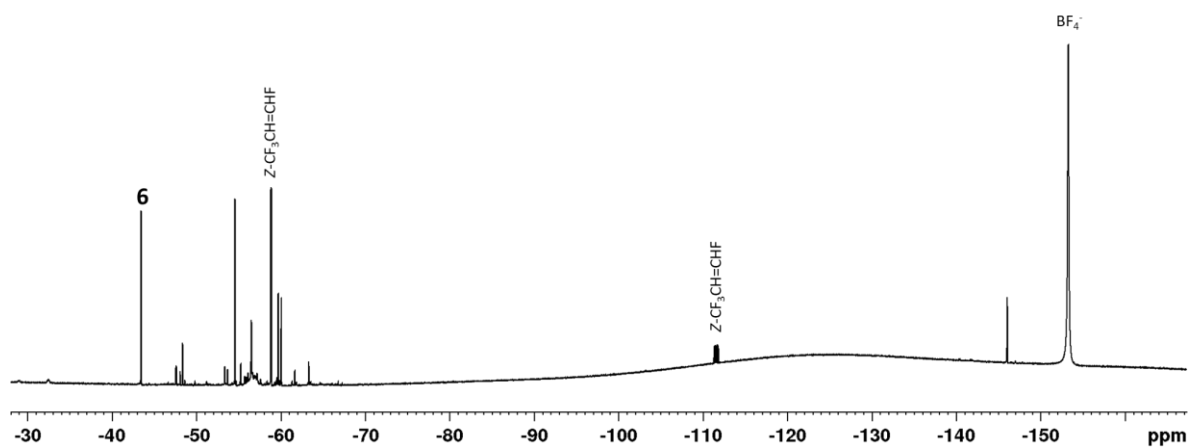

**S22.** <sup>19</sup>F NMR spectrum of the reaction of complex [Rh{(E)-CF=CHCF<sub>3</sub>}(PEt<sub>3</sub>)<sub>3</sub>] (**3**) with BF<sub>3</sub> at 263 K in CD<sub>2</sub>Cl<sub>2</sub>.

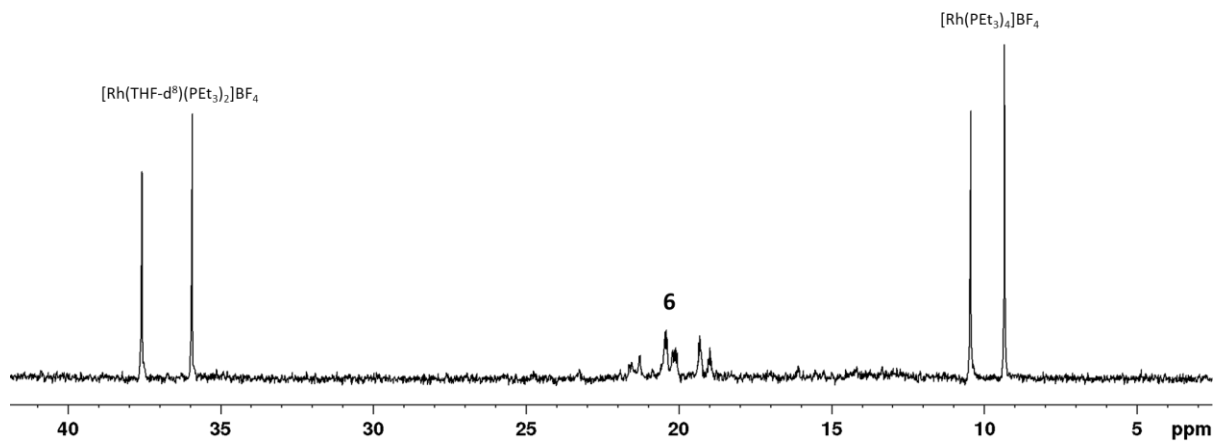

**S23.**  $^{31}\text{P}\{^1\text{H}\}$  NMR spectrum of the reaction of complex  $[\text{Rh}\{(E)\text{-CF=CHCF}_3\}(\text{PEt}_3)_3]$  (**3**) with  $\text{LiBF}_4$  in  $\text{THF-d}^8$ .

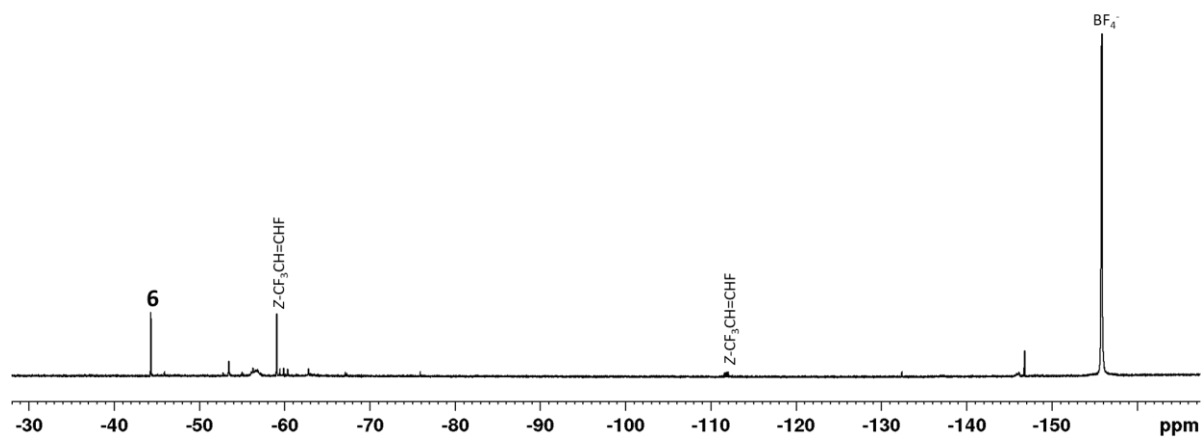

**S24.**  $^{19}\text{F}$  NMR spectrum of the reaction of complex  $[\text{Rh}\{(E)\text{-CF=CHCF}_3\}(\text{PEt}_3)_3]$  (**3**) with  $\text{LiBF}_4$  in  $\text{THF-d}^8$ .

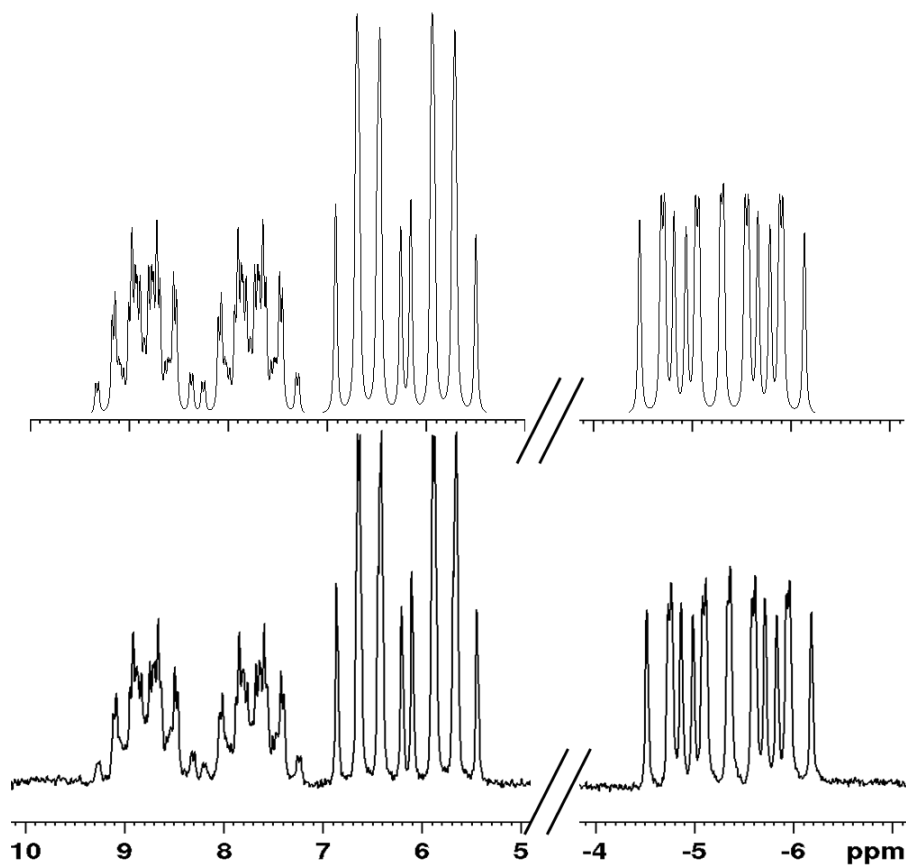

**S25.**  $^{31}\text{P}\{^1\text{H}\}$  NMR spectrum of complex  $\text{fac-}[\text{Rh}(\text{CH}_3)(\text{CF}_3\text{CHCHF})(\text{PEt}_3)_3]$  (**9**) in  $\text{toluene-d}^8$  at 213 K: experimental (bottom), simulated (top).<sup>6</sup>

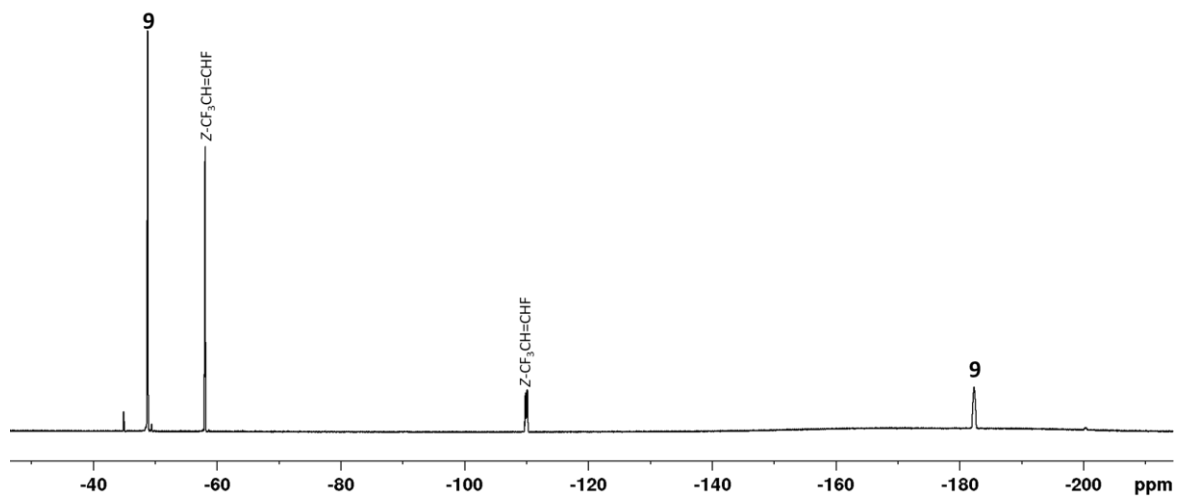

S26.  $^{19}\text{F}$  NMR spectrum of complex *fac*- $[\text{Rh}(\text{CH}_3)(\text{CF}_3\text{CHCHF})(\text{PEt}_3)_3]$  (**9**) in toluene- $\text{d}^8$  at 238 K.

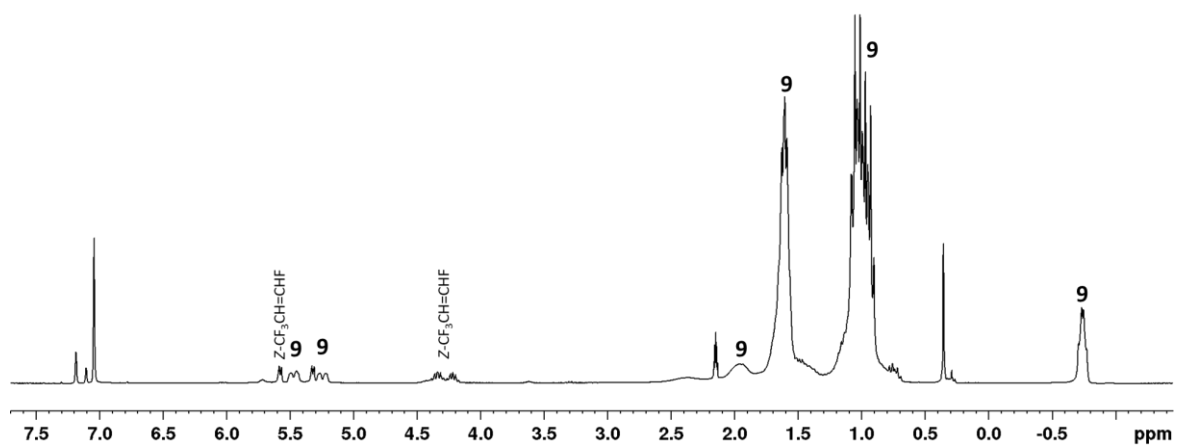

S27.  $^1\text{H}$  NMR spectrum of complex *fac*- $[\text{Rh}(\text{CH}_3)(\text{CF}_3\text{CHCHF})(\text{PEt}_3)_3]$  (**9**) in toluene- $\text{d}^8$  at 238 K.

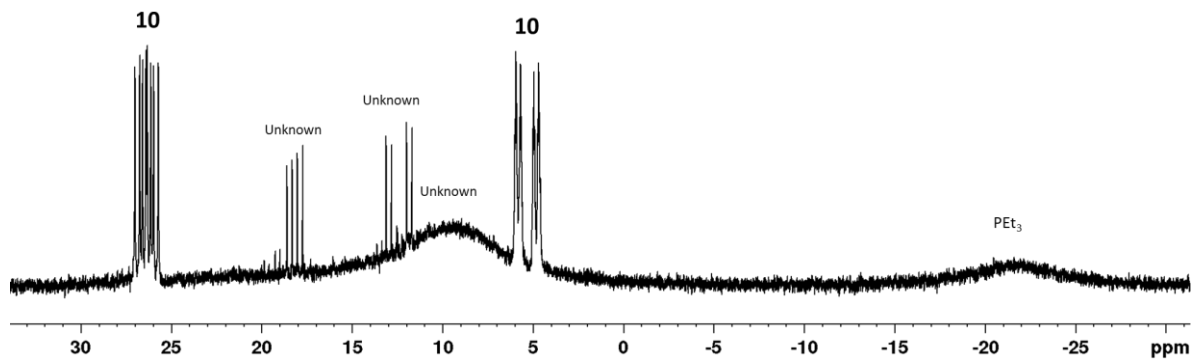

S28.  $^{31}\text{P}\{^1\text{H}\}$  NMR spectrum of the reaction of  $[\text{Rh}\{(E)\text{-CF=CHCF}_3\}(\text{PEt}_3)_3]$  (**3**) with CO in toluene- $\text{d}^8$  at 213 K.

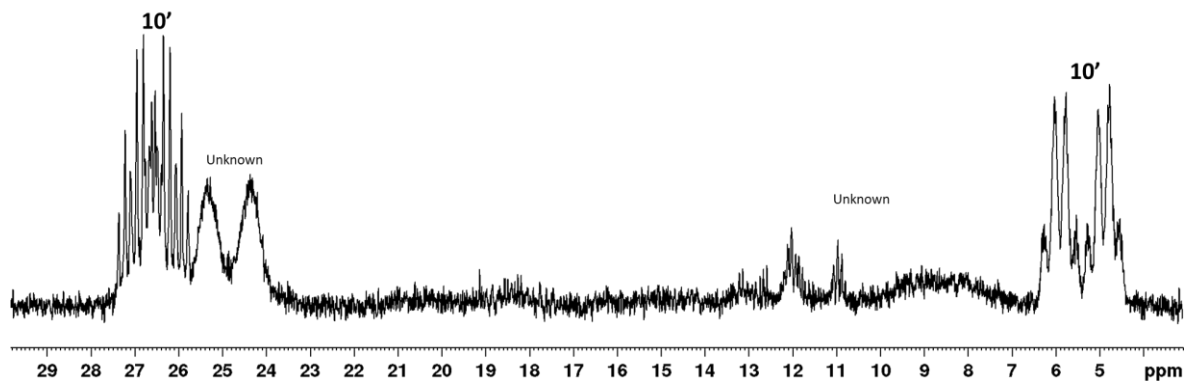

**S29.** Section of  $^{31}\text{P}\{^1\text{H}\}$  NMR spectrum of the reaction of  $[\text{Rh}\{(E)\text{-CF=CHCF}_3\}(\text{PEt}_3)_3]$  (**3**) with  $^{13}\text{CO}$  in toluene- $\text{d}^8$  at 201 K.

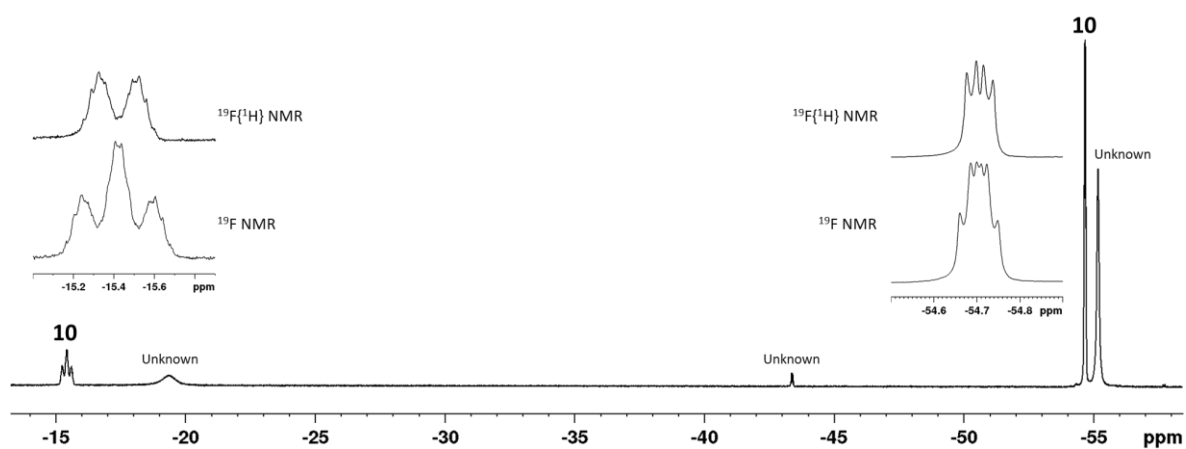

**S30.**  $^{19}\text{F}$  NMR spectrum of the reaction of  $[\text{Rh}\{(E)\text{-CF=CHCF}_3\}(\text{PEt}_3)_3]$  (**3**) with  $\text{CO}$  in toluene- $\text{d}^8$  at 213 K.

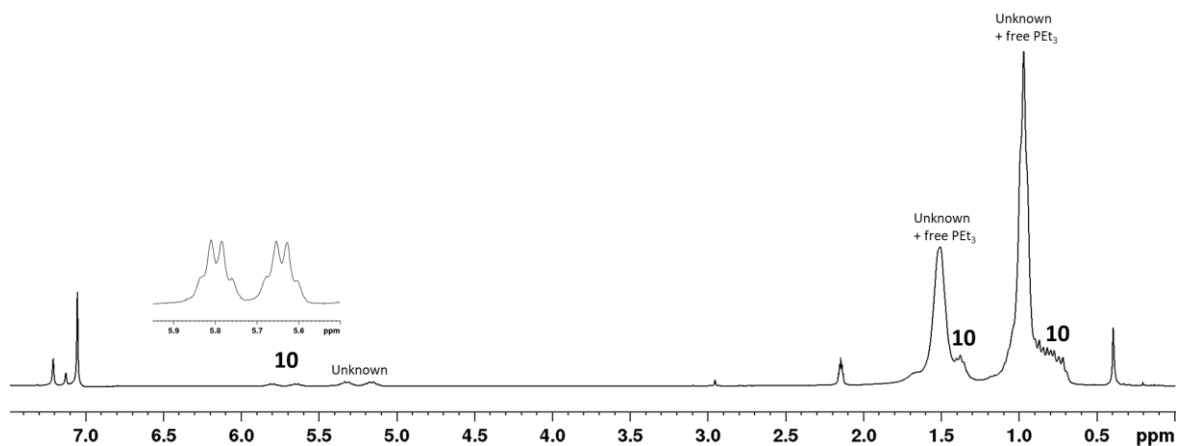

**S31.**  $^1\text{H}$  NMR spectrum of the reaction of  $[\text{Rh}\{(E)\text{-CF=CHCF}_3\}(\text{PEt}_3)_3]$  (**3**) with  $\text{CO}$  in toluene- $\text{d}^8$  at 213 K.

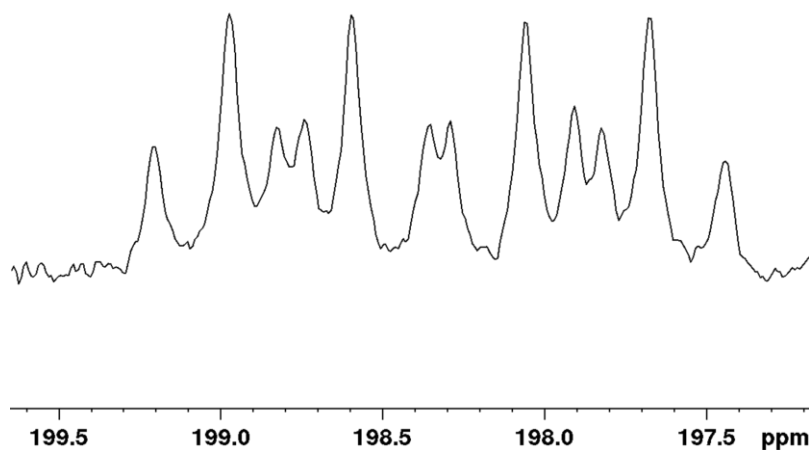

**S32.** Section of the  $^{13}\text{C}\{^1\text{H}\}$  NMR spectrum of the reaction of  $[\text{Rh}\{(E)\text{-CF=CHCF}_3\}(\text{PEt}_3)_3]$  (**3**) with  $^{13}\text{CO}$  in toluene- $d^8$  at 201 K.

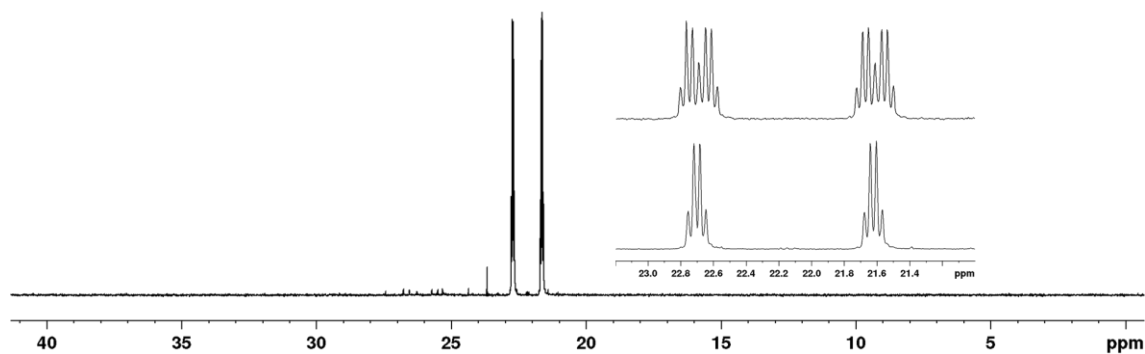

**S33.**  $^{31}\text{P}\{^1\text{H}\}$  NMR spectrum of complex *trans*- $[\text{Rh}\{(E)\text{-CF=CHCF}_3\}(\text{CO})(\text{PEt}_3)_2]$  (**11**) in  $\text{C}_6\text{D}_6$ . The signals for **11** (bottom) and **11'** (top) are shown for comparison.

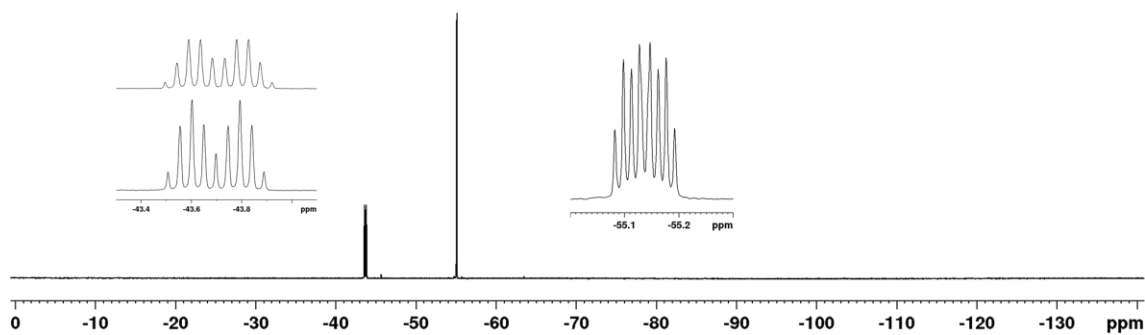

**S34.**  $^{19}\text{F}$  NMR spectrum of complex *trans*- $[\text{Rh}\{(E)\text{-CF=CHCF}_3\}(\text{CO})(\text{PEt}_3)_2]$  (**11**) in  $\text{C}_6\text{D}_6$ . The signals for **11** (bottom) and **11'** (top) are shown for comparison.



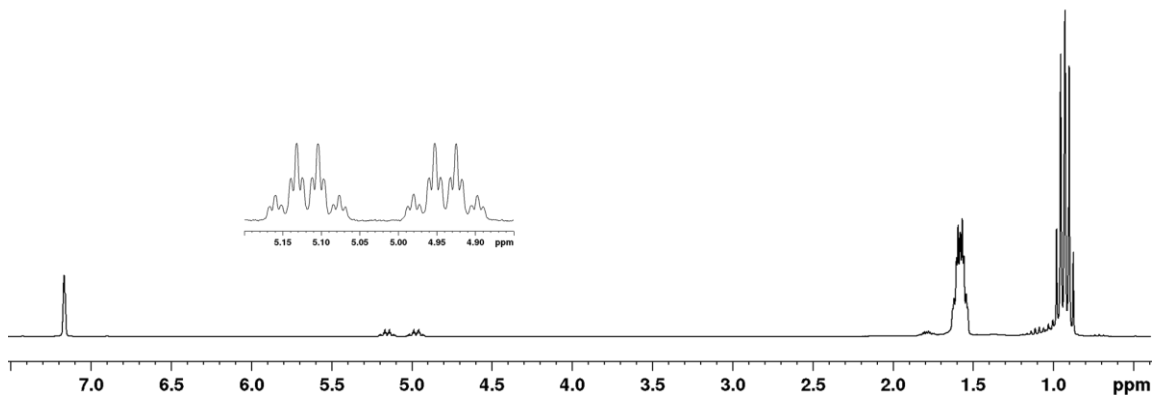

**S35.**  $^1\text{H}$  NMR spectrum of complex *trans*- $[\text{Rh}\{(E)\text{-CF=CHCF}_3\}(\text{CO})(\text{PEt}_3)_2]$  (**11**) in  $\text{C}_6\text{D}_6$  (no changes in complex **11'**).

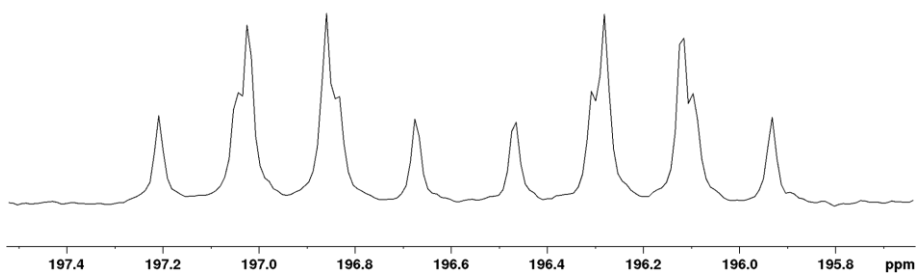

**S36.** Section of the  $^{13}\text{C}\{^1\text{H}\}$  NMR spectrum of complex *trans*- $[\text{Rh}\{(E)\text{-CF=CHCF}_3\}(\text{}^{13}\text{CO})(\text{PEt}_3)_2]$  (**11'**) in  $\text{C}_6\text{D}_6$ .

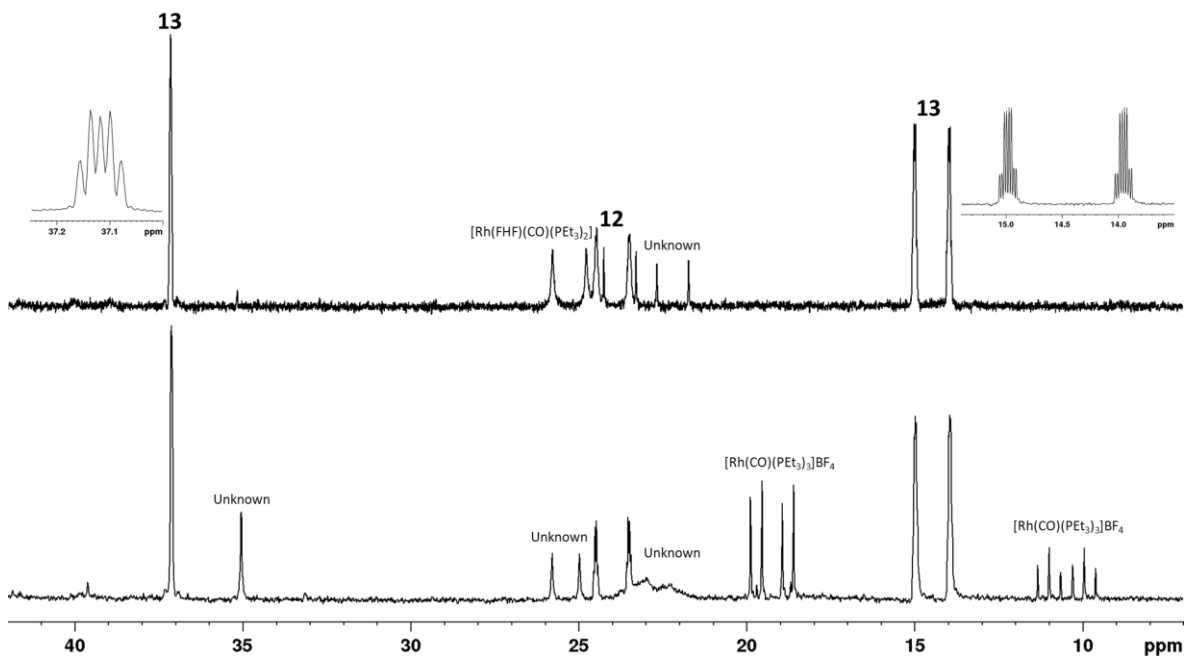

**S37.**  $^{31}\text{P}\{^1\text{H}\}$  NMR spectrum of the reaction of  $[\text{Rh}(\text{C}\equiv\text{CCF}_3)(\text{CO})(\text{PEt}_3)_3]$  (**12**) with HF (top) or  $\text{HBF}_4$  (bottom) in  $\text{CD}_2\text{Cl}_2$ .

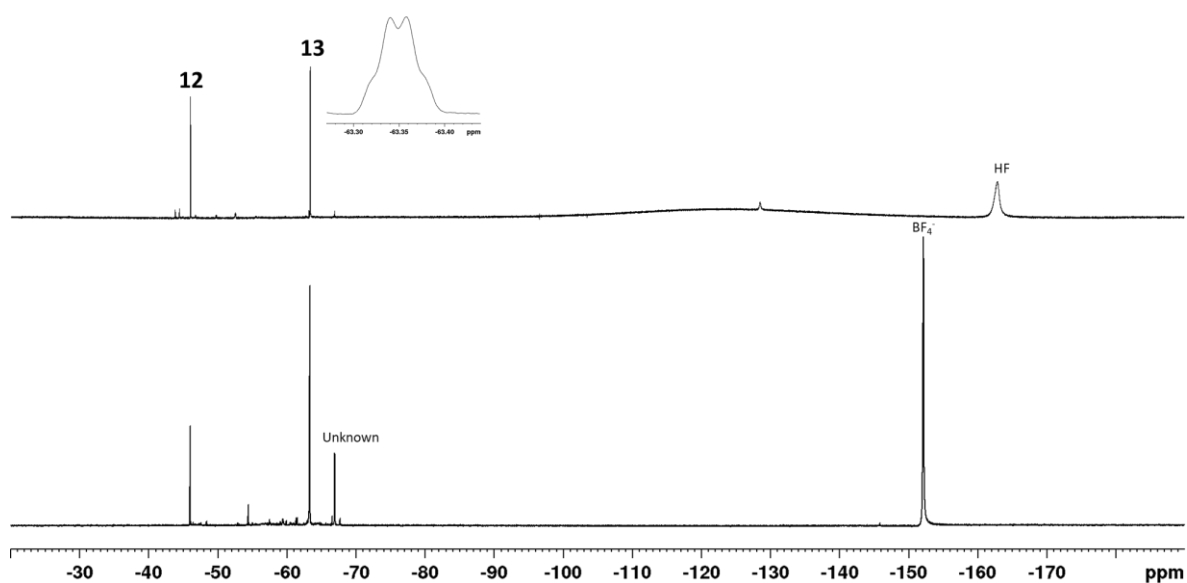

**S38.**  $^{19}\text{F}$  NMR spectrum of the reaction of  $[\text{Rh}(\text{C}\equiv\text{CCF}_3)(\text{CO})(\text{PEt}_3)_3]$  (**12**) with HF (top) or HBF<sub>4</sub> (bottom) in  $\text{CD}_2\text{Cl}_2$ .

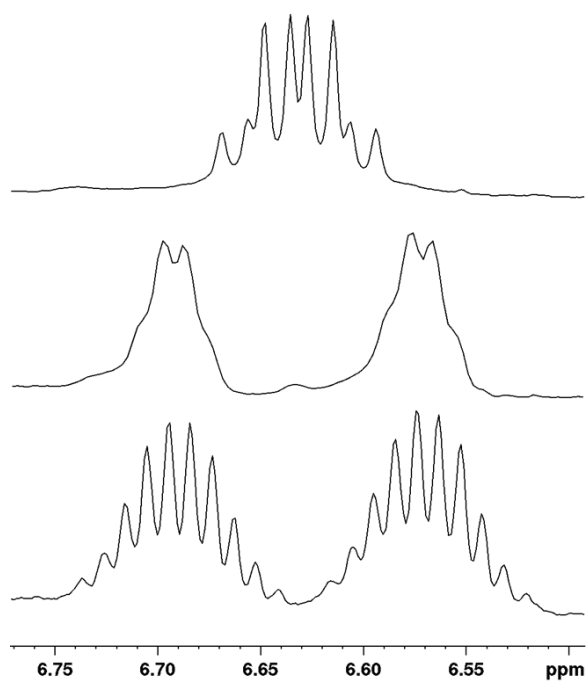

**S39.** Section of the  $^1\text{H}$  NMR (bottom),  $^1\text{H}\{^{19}\text{F}\}$  NMR (middle) and  $^1\text{H}\{^{31}\text{P}\}$  NMR (top) of complex  $[\text{Rh}\{(\text{Z})\text{-C}(\text{PEt}_3)=\text{CHCF}_3\}(\text{CO})(\text{PEt}_3)_2]^+$  (**13**) corresponding to the vinyl proton of the phosphonioalkenyl ligand in  $\text{CD}_2\text{Cl}_2$ .

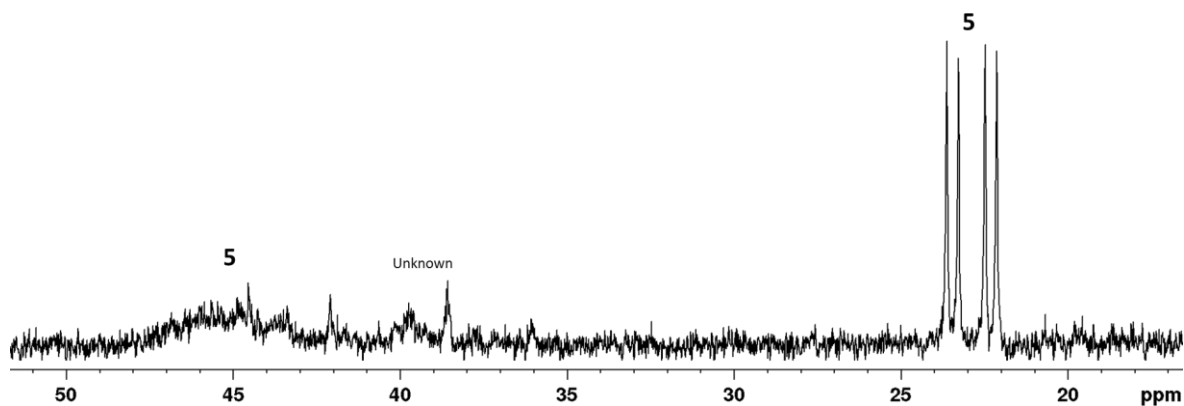

**S40.**  $^{31}\text{P}\{^1\text{H}\}$  NMR spectrum of the reaction of  $[\text{Rh}(\text{C}\equiv\text{CCF}_3)(\text{PEt}_3)_3]$  (**6**) with  $\text{Et}_3\text{N}\cdot 3\text{HF}$  in  $\text{C}_6\text{D}_6$ .

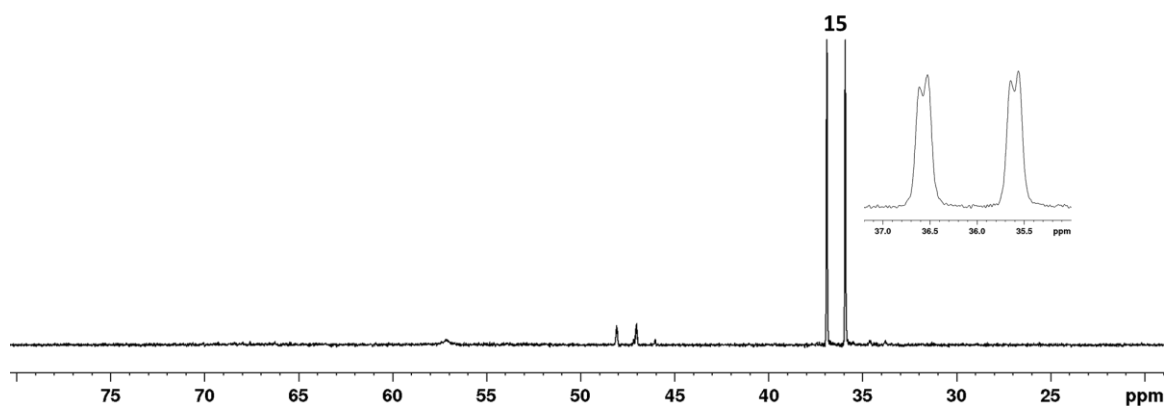

**S41.**  $^{31}\text{P}\{^1\text{H}\}$  NMR spectrum of complex  $[\text{Rh}(\text{F})(\text{CH}\equiv\text{CCF}_3)(\text{PiPr}_3)_2]$  (**15**) in  $\text{Tol-d}_8$  at 233 K.

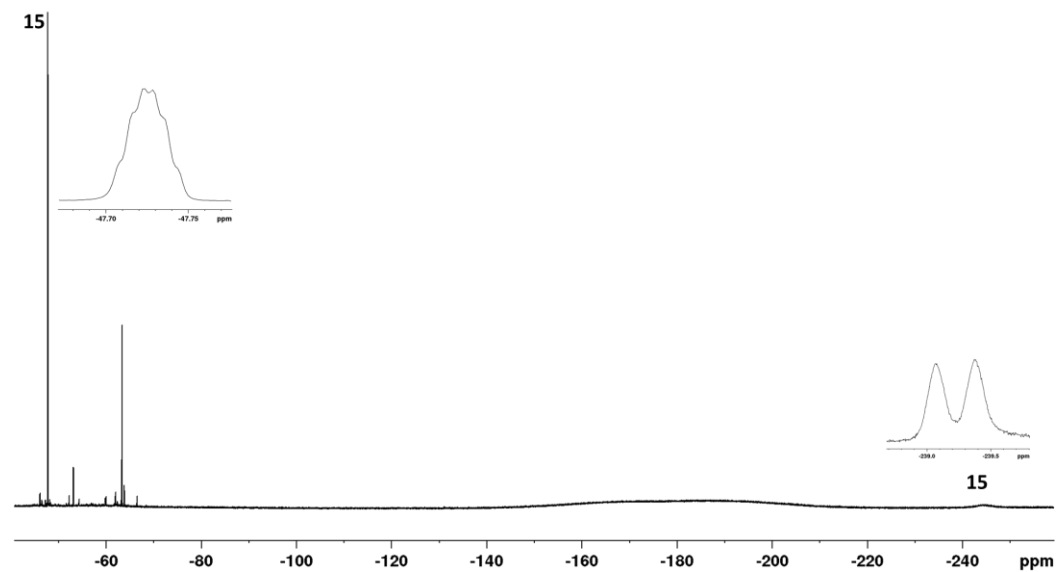

**S42.**  $^{19}\text{F}$  NMR spectrum of complex  $[\text{Rh}(\text{F})(\text{CH}\equiv\text{CCF}_3)(\text{PiPr}_3)_2]$  (**15**) in  $\text{Tol-d}_8$  showing the Rh-F ligand resonance at 233 K.

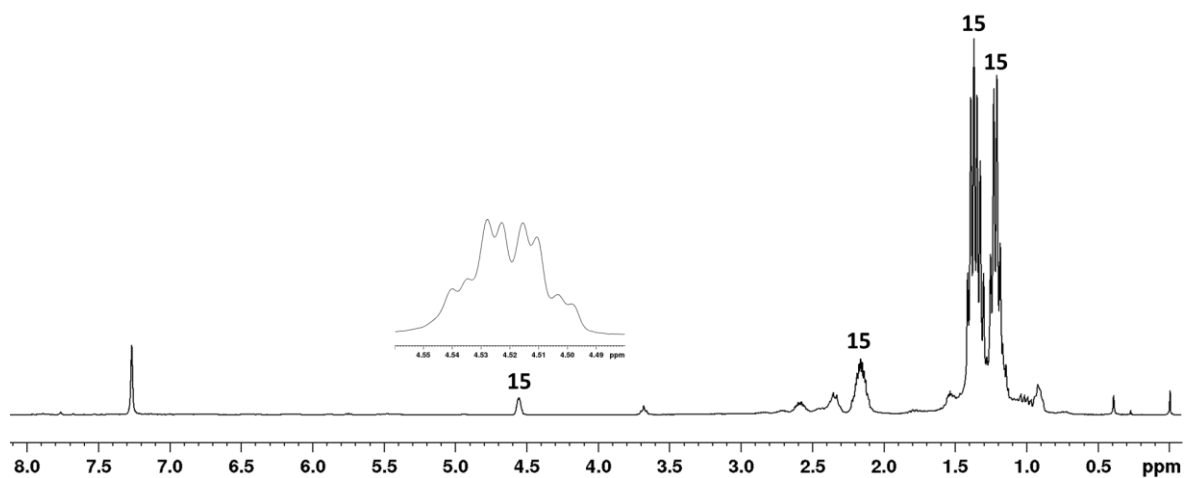

**S43.**  $^1\text{H}$  NMR spectrum of complex  $[\text{Rh}(\text{F})(\text{CH}\equiv\text{CCF}_3)(\text{P}i\text{Pr}_3)_2]$  (**15**) in  $\text{C}_6\text{D}_6$ .

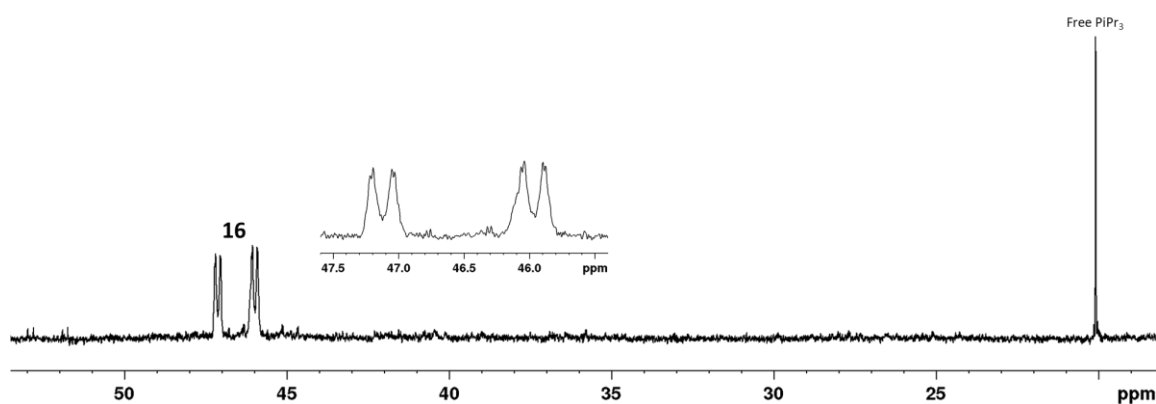

**S44.**  $^{31}\text{P}\{^1\text{H}\}$  NMR spectrum of complex  $[\text{Rh}(\text{F})(=\text{C}=\text{CHCF}_3)(\text{P}i\text{Pr}_3)_2]$  (**16**) in  $\text{C}_6\text{D}_6$ .

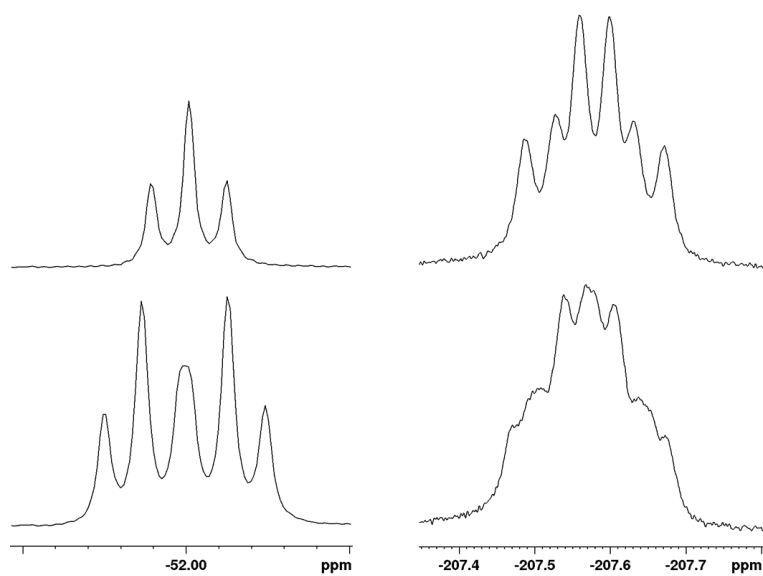

**S45.** Sections of the  $^{19}\text{F}$  NMR (bottom) and the  $^{19}\text{F}\{^1\text{H}\}$  NMR (top) spectra of complex  $[\text{Rh}(\text{F})(=\text{C}=\text{CHCF}_3)(\text{P}i\text{Pr}_3)_2]$  (**16**) in  $\text{C}_6\text{D}_6$ .

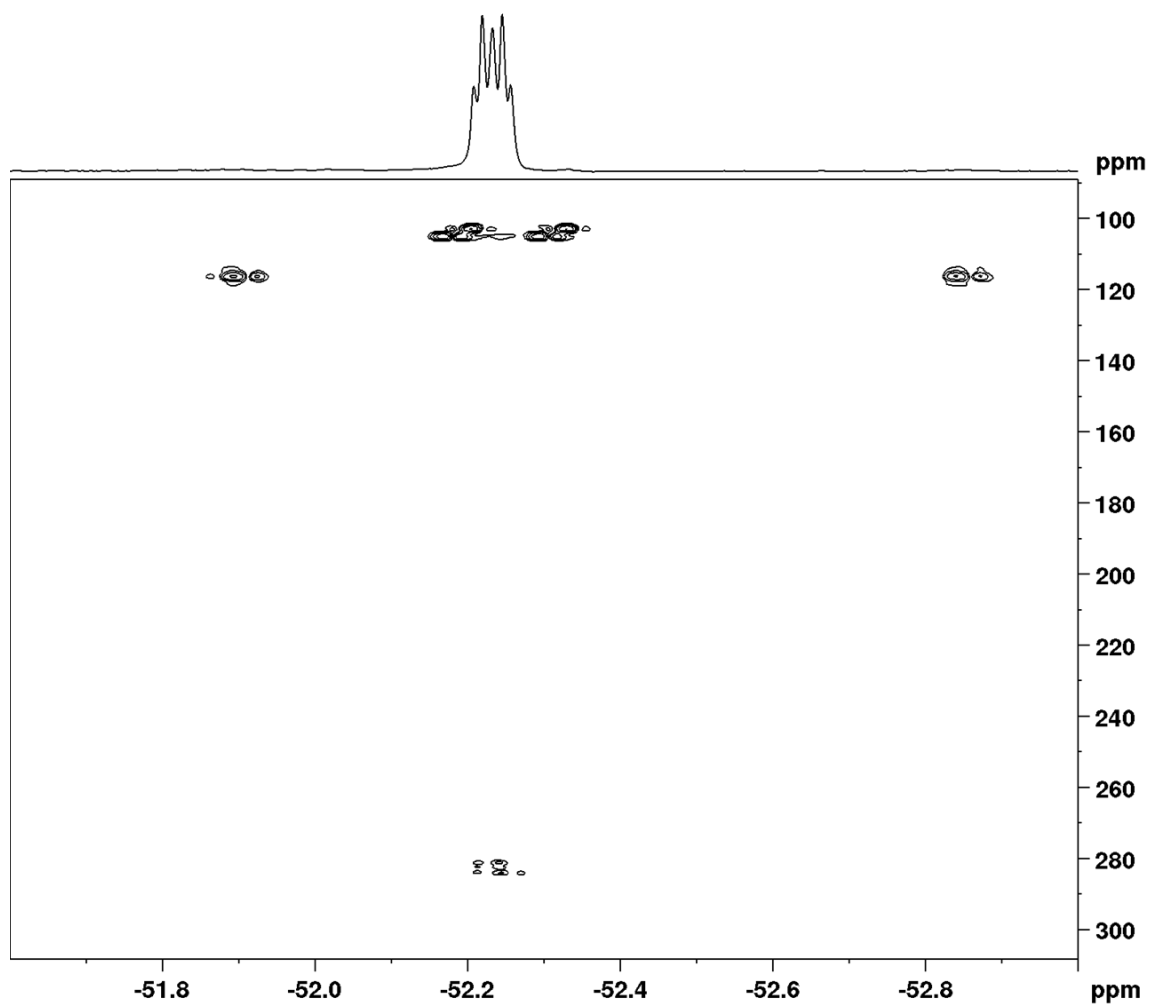

**S46.**  $^{19}\text{F}$ ,  $^{13}\text{C}$  HMBC NMR spectrum of complex  $[\text{Rh}(\text{F})(=\text{C}=\text{CHCF}_3)(\text{PiPr}_3)_2]$  (**16**) in  $\text{C}_6\text{D}_6$ .

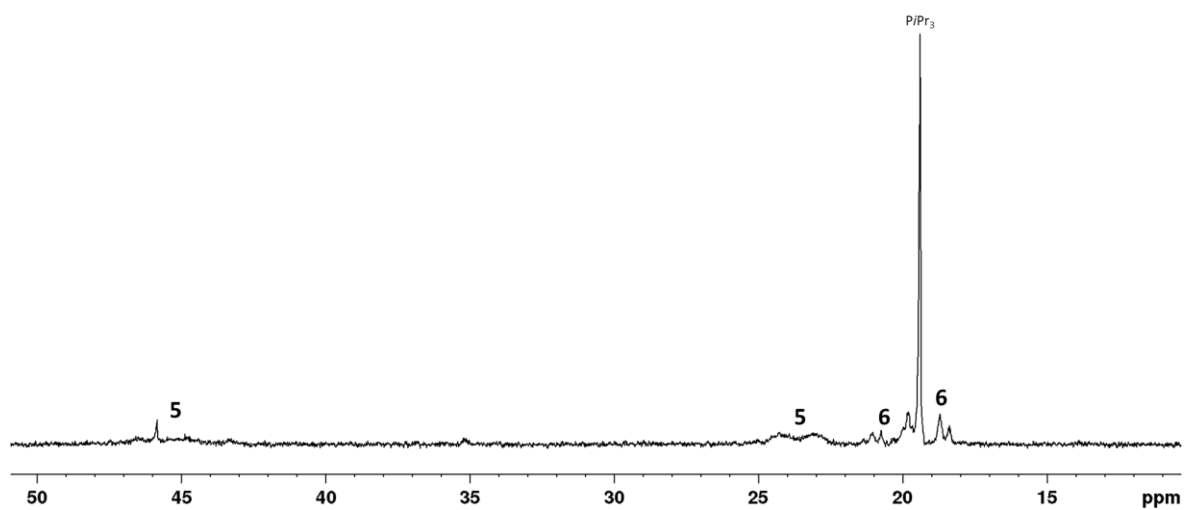

**S47.**  $^{31}\text{P}\{^1\text{H}\}$  NMR spectrum of the reaction of complex  $[\text{Rh}(\text{F})(=\text{C}=\text{CHCF}_3)(\text{PiPr}_3)_2]$  (**16**) with  $\text{PEt}_3$  in  $\text{C}_6\text{D}_6$ .

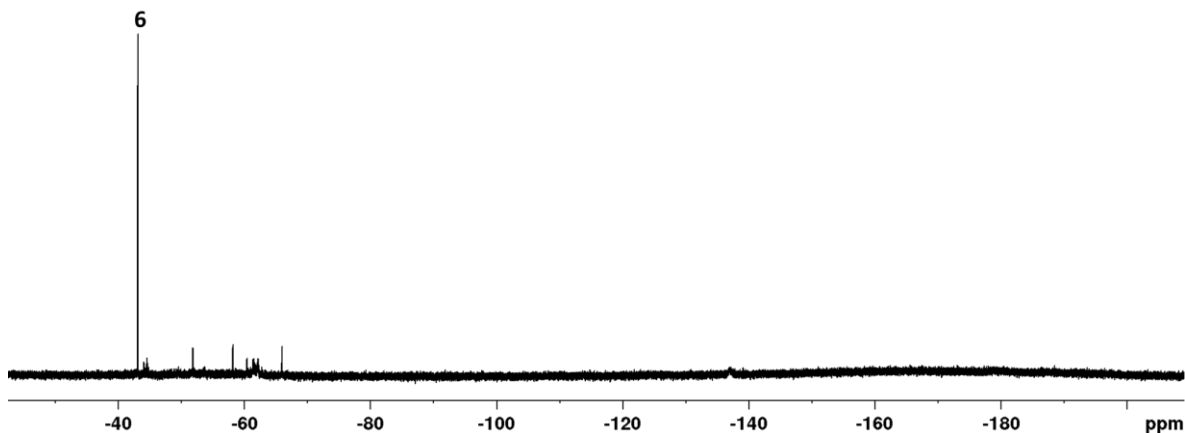

**S48.**  $^{19}\text{F}$  NMR spectrum of the reaction of complex  $[\text{Rh}(\text{F})(=\text{C}=\text{CHCF}_3)(\text{P}i\text{Pr}_3)_2]$  (**16**) with  $\text{PEt}_3$  in  $\text{C}_6\text{D}_6$ .

### DFT calculations

#### Computational details for geometry optimization of all the calculated complexes

Calculations were run using the Gaussian 09 (Revision D.01) program package.<sup>11</sup> All rhodium complexes were calculated using the BP86 functional. Rhodium was described with RECPs and the associated def2-SVP basis sets.<sup>12,13</sup> All the other atoms were described with def2-SVP basis sets. A Grimme D3 dispersion correction with Becke-Johnson damping was included.<sup>14,15</sup> All calculated structures were identified as minima (no negative eigenvalues).

#### Geometry optimization of both possible rotamers of complexes **7** and **9**

Complex **7**

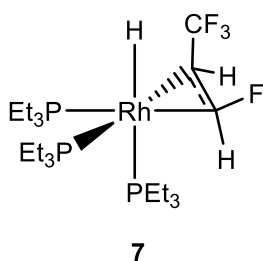

Complex **7a**

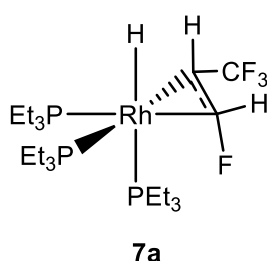

Energies in Hartree (corrected for zero-point energy): -2361.736294 for complex **7** and -2361.734125 for complex **7a**. Accordingly, structure **7** is slightly favored by 5.7 kJ/mol.

Complex **9**

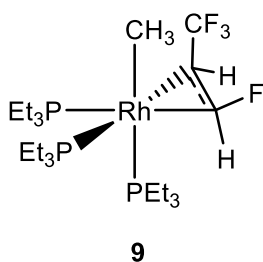

Complex **9a**

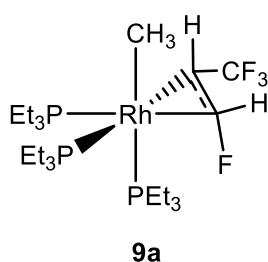

Energy in Hartree (corrected for zero-point energy): -2400.978525 for complex **12** and -2400.978446 for complex **9a**. Accordingly, both structures are possible as complex **9** is only favored by 0.2 kJ/mol.

### Geometry optimization of complex **10**

In order to optimize the structure of complex **10**, calculations with different initial structures were run, which did not non-converge except for the structure shown in Figure S49.

Energy in Hartree (corrected for zero-point energy): -2008.420899.

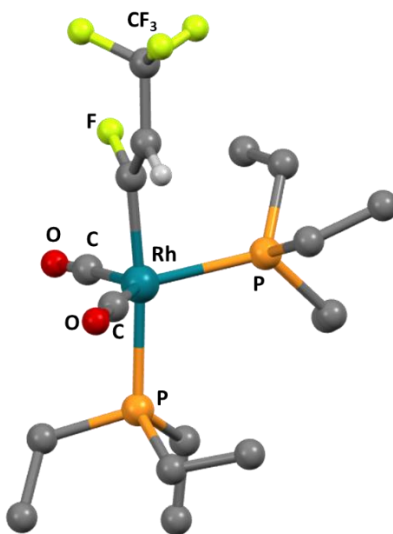

**S49.** Optimized structure of complex **10**. Hydrogen atoms of the phosphine ligands have been omitted for clarity.





|                   |          |          |          |   |          |          |          |   |         |          |          |   |          |          |          |
|-------------------|----------|----------|----------|---|----------|----------|----------|---|---------|----------|----------|---|----------|----------|----------|
| C                 | 2.24411  | -2.22154 | -1.66888 | H | 1.58267  | -0.45724 | -2.75137 | C | 2.38685 | 2.60746  | 0.97254  | H | 1.53071  | -0.83856 | -2.66508 |
| F                 | 2.22209  | -1.33205 | -2.69196 | C | 2.27692  | -2.11441 | -1.65117 | F | 2.34843 | 2.36779  | 2.30198  | C | 2.10636  | -2.47025 | -1.47554 |
| F                 | 2.32841  | -3.46190 | -2.24399 | H | -0.13281 | 0.94839  | -1.87668 | F | 2.59890 | 3.95970  | 0.83693  | C | -0.00172 | 1.06957  | -2.45988 |
| F                 | 3.45040  | -2.04285 | -1.02296 | F | 2.78633  | -2.68648 | -2.78760 | F | 3.54085 | 2.01956  | 0.50011  | H | -0.57622 | 2.01749  | -2.43785 |
| H                 | 1.37736  | -2.72352 | 0.19086  | F | 1.88892  | -3.15826 | -0.85898 | H | 1.42180 | 2.44669  | -0.86438 | H | -0.40070 | 0.46037  | -3.29816 |
| H                 | 0.42640  | 0.10213  | -1.75376 | F | 3.35304  | -1.53490 | -1.02639 | C | 0.52368 | 0.16599  | 2.35997  | H | 1.04684  | 1.32433  | -2.72569 |
|                   |          |          |          |   |          |          |          | H | 0.01891 | -0.69362 | 2.84657  | F | 2.59290  | -3.08418 | -2.59967 |
|                   |          |          |          |   |          |          |          | H | 0.23446 | 1.09070  | 2.88694  | F | 1.62943  | -3.48008 | -0.68675 |
|                   |          |          |          |   |          |          |          | H | 1.61582 | 0.03327  | 2.49321  | F | 3.21189  | -1.96874 | -0.83445 |
| <b>Complex 10</b> |          |          |          |   |          |          |          |   |         |          |          |   |          |          |          |
| Rh                | -0.22596 | -0.61361 | 0.17527  |   |          |          |          |   |         |          |          |   |          |          |          |
| P                 | -2.57543 | -0.50446 | -0.13877 |   |          |          |          |   |         |          |          |   |          |          |          |
| C                 | 1.26586  | 1.83767  | -1.87440 |   |          |          |          |   |         |          |          |   |          |          |          |
| C                 | 1.85437  | 2.24784  | 0.93543  |   |          |          |          |   |         |          |          |   |          |          |          |
| C                 | -0.71133 | 3.10110  | -0.19722 |   |          |          |          |   |         |          |          |   |          |          |          |
| P                 | 0.48356  | 1.66179  | -0.18853 |   |          |          |          |   |         |          |          |   |          |          |          |
| C                 | -3.33549 | -2.09963 | 0.46444  |   |          |          |          |   |         |          |          |   |          |          |          |
| C                 | -4.67593 | -2.55485 | -0.12412 |   |          |          |          |   |         |          |          |   |          |          |          |
| C                 | -3.16424 | -0.37958 | -1.89580 |   |          |          |          |   |         |          |          |   |          |          |          |
| C                 | -2.62604 | 0.83942  | -2.64631 |   |          |          |          |   |         |          |          |   |          |          |          |
| C                 | -3.47816 | 0.84423  | 0.76482  |   |          |          |          |   |         |          |          |   |          |          |          |
| C                 | -5.00925 | 0.84605  | 0.74360  |   |          |          |          |   |         |          |          |   |          |          |          |
| C                 | 1.61978  | 2.03154  | 2.43446  |   |          |          |          |   |         |          |          |   |          |          |          |
| C                 | 2.06155  | 3.11130  | -2.17404 |   |          |          |          |   |         |          |          |   |          |          |          |
| H                 | -3.38622 | -1.99439 | 1.57030  |   |          |          |          |   |         |          |          |   |          |          |          |
| H                 | -2.55025 | -2.86158 | 0.27955  |   |          |          |          |   |         |          |          |   |          |          |          |
| H                 | -4.27441 | -0.39954 | -1.90347 |   |          |          |          |   |         |          |          |   |          |          |          |
| H                 | -2.82429 | -1.31627 | -2.38651 |   |          |          |          |   |         |          |          |   |          |          |          |
| H                 | -2.99549 | 1.79035  | -2.20921 |   |          |          |          |   |         |          |          |   |          |          |          |
| H                 | -2.94217 | 0.82022  | -3.70911 |   |          |          |          |   |         |          |          |   |          |          |          |
| H                 | -1.51789 | 0.85804  | -2.61895 |   |          |          |          |   |         |          |          |   |          |          |          |
| H                 | -3.07835 | 1.78911  | 0.34494  |   |          |          |          |   |         |          |          |   |          |          |          |
| H                 | -3.09117 | 0.79481  | 1.80489  |   |          |          |          |   |         |          |          |   |          |          |          |
| H                 | -5.41419 | 0.84549  | -0.28945 |   |          |          |          |   |         |          |          |   |          |          |          |
| H                 | -5.39925 | 1.75447  | 1.24809  |   |          |          |          |   |         |          |          |   |          |          |          |
| H                 | -5.43071 | -0.03006 | 1.27512  |   |          |          |          |   |         |          |          |   |          |          |          |
| C                 | -1.20812 | 3.55282  | 1.17994  |   |          |          |          |   |         |          |          |   |          |          |          |
| H                 | -4.59784 | -2.75502 | -1.21163 |   |          |          |          |   |         |          |          |   |          |          |          |
| H                 | -5.48652 | -1.81510 | 0.02461  |   |          |          |          |   |         |          |          |   |          |          |          |
| H                 | -4.99824 | -3.50130 | 0.35756  |   |          |          |          |   |         |          |          |   |          |          |          |
| H                 | 2.75239  | 1.67918  | 0.61332  |   |          |          |          |   |         |          |          |   |          |          |          |
| H                 | 2.04984  | 3.31808  | 0.70631  |   |          |          |          |   |         |          |          |   |          |          |          |
| H                 | 0.43542  | 1.69891  | -2.59996 |   |          |          |          |   |         |          |          |   |          |          |          |
| H                 | 1.91275  | 0.94240  | -1.97178 |   |          |          |          |   |         |          |          |   |          |          |          |
| H                 | 1.45691  | 4.03338  | -2.04380 |   |          |          |          |   |         |          |          |   |          |          |          |
| H                 | 2.42177  | 3.10369  | -3.22395 |   |          |          |          |   |         |          |          |   |          |          |          |
| H                 | 2.95433  | 3.19686  | -1.52289 |   |          |          |          |   |         |          |          |   |          |          |          |
| H                 | -2.07113 | 4.24416  | 1.08314  |   |          |          |          |   |         |          |          |   |          |          |          |
| H                 | -0.41623 | 4.09165  | 1.73663  |   |          |          |          |   |         |          |          |   |          |          |          |
| H                 | -1.52788 | 2.69520  | 1.80575  |   |          |          |          |   |         |          |          |   |          |          |          |
| H                 | -0.22865 | 3.95084  | -0.72646 |   |          |          |          |   |         |          |          |   |          |          |          |
| H                 | -1.55626 | 2.77535  | -0.83952 |   |          |          |          |   |         |          |          |   |          |          |          |
| C                 | 1.78928  | -0.94026 | 0.40706  |   |          |          |          |   |         |          |          |   |          |          |          |
| C                 | 2.75059  | -1.09010 | -0.54256 |   |          |          |          |   |         |          |          |   |          |          |          |
| H                 | 2.47339  | -1.13033 | -1.60320 |   |          |          |          |   |         |          |          |   |          |          |          |
| H                 | 0.75906  | 2.61098  | 2.81964  |   |          |          |          |   |         |          |          |   |          |          |          |
| H                 | 2.51782  | 2.34278  | 3.00716  |   |          |          |          |   |         |          |          |   |          |          |          |
| H                 | 1.43951  | 0.96342  | 2.65230  |   |          |          |          |   |         |          |          |   |          |          |          |
| F                 | 2.24890  | -0.95148 | 1.69773  |   |          |          |          |   |         |          |          |   |          |          |          |
| C                 | 4.21416  | -1.17586 | -0.25465 |   |          |          |          |   |         |          |          |   |          |          |          |
| F                 | 4.70540  | -0.02719 | 0.32107  |   |          |          |          |   |         |          |          |   |          |          |          |
| F                 | 4.91365  | -1.35301 | -1.40939 |   |          |          |          |   |         |          |          |   |          |          |          |
| F                 | 4.56048  | -2.18768 | 0.58234  |   |          |          |          |   |         |          |          |   |          |          |          |
| C                 | -0.55358 | -0.96747 | 2.03239  |   |          |          |          |   |         |          |          |   |          |          |          |
| O                 | -0.80025 | -1.19882 | 3.14876  |   |          |          |          |   |         |          |          |   |          |          |          |
| C                 | -0.15985 | -1.69607 | -1.37750 |   |          |          |          |   |         |          |          |   |          |          |          |
| O                 | -0.13689 | -2.37842 | -2.32704 |   |          |          |          |   |         |          |          |   |          |          |          |

## References

1. D. D. Perrin and W. L. F. Armarego, *Purification of Laboratory Chemicals*, Butterworth/Heinemann, London/Oxford, 3rd edn., 1988.
2. T. Braun, D. Noveski, M. Ahijado and F. Wehmeier, *Dalton Trans.*, 2007, 3820-3825.
3. P. Zhao and J. F. Hartwig, *Organometallics*, 2008, **27**, 4749-4757.
4. C. N. von Hahmann, M. Talavera, C. Xu and T. Braun, *Chem. Eur. J.*, 2018, **24**, 11131-11138.
5. J. Vicente, J. Gil-Rubio, D. Bautista, A. Sironi and N. Masciocchi, *Inorg. Chem.*, 2004, **43**, 5665-5675.
6. P. H. M. Budzelaar *gNMR*, Version 4.1; Adept Scientific plc: Letchworth, 2001.
7. D. Noveski, T. Braun and S. Krückemeier, *J. Fluorine Chem.*, 2004, **125**, 959-966.
8. M. Talavera, C. N. von Hahmann, R. Müller, M. Ahrens, M. Kaupp and T. Braun, *Angew. Chem. Int. Ed.*, 2019, **58**, 10688-10692, *Angew. Chem.*, **2019**, **131**, 10798-10802.
9. J. Gil-Rubio, B. Weberndörfer and H. Werner, *J. Chem. Soc., Dalton Trans.*, 1999, 1437-1444.
10. L. Zámostná and T. Braun, *Angew. Chem. Int. Ed.*, 2015, **54**, 10652-10656.
11. G. W. T. M. J. Frisch, H. B. Schlegel, G. E. Scuseria, M. A. Robb, J. R. Cheeseman, G. Scalmani, V. Barone, G. A. Petersson, H. Nakatsuji, X. Li, M. Caricato, A. Marenich, J. Bloino, B. G. Janesko, R. Gomperts, B. Mennucci, H. P. Hratchian, J. V. Ortiz, A. F. Izmaylov, J. L. Sonnenberg, D. Williams-Young, F. Ding, F. Lipparini, F. Egidi, J. Goings, B. Peng, A. Petrone, T. Henderson, D. Ranasinghe, V. G. Zakrzewski, J. Gao, N. Rega, G. Zheng, W. Liang, M. Hada, M. Ehara, K. Toyota, R. Fukuda, J. Hasegawa, M. Ishida, T. Nakajima, Y. Honda, O. Kitao, H. Nakai, T. Vreven, K. Throssell, J. A. Montgomery, Jr., J. E. Peralta, F. Ogliaro, M. Bearpark, J. J. Heyd, E. Brothers, K. N. Kudin, V. N. Staroverov, T. Keith, R. Kobayashi, J. Normand, K. Raghavachari, A. Rendell, J. C. Burant, S. S. Iyengar, J. Tomasi, M. Cossi, J. M. Millam, M. Klene, C. Adamo, R. Cammi, J. W. Ochterski, R. L. Martin, K. Morokuma, O. Farkas, J. B. Foresman, and D. J. Fox *Gaussian 09*, Revision D.01; Gaussian, Inc.: Wallingford CT, 2016.
12. D. Andrae, U. Häußermann, M. Dolg, H. Stoll and H. Preuß, *Theor. Chim. Acta*, 1990, **77**, 123-141.
13. F. Weigend and R. Ahlrichs, *Phys. Chem. Chem. Phys.*, 2005, **7**, 3297-3305.
14. S. Grimme, S. Ehrlich and L. Goerigk, *J. Comput. Chem.*, 2011, **32**, 1456-1465.
15. S. Grimme, J. Antony, S. Ehrlich and H. Krieg, *J. Chem. Phys.*, 2010, **132**, 154104.
